1 Long-read whole genome sequencing and comparative analysis of six strains of the human  
2 pathogen *Orientia tsutsugamushi*

3

4

5 Elizabeth M. Batty<sup>a,b,c</sup>, Suwittra Chaemchuen<sup>b</sup>, Stuart D. Blacksell<sup>b,c</sup>, Daniel Paris<sup>b,c,d,e</sup>, Rory  
6 Bowden<sup>a</sup>, Caroline Chan<sup>f</sup>, Ramkumar Lachumanan<sup>f</sup>, Nicholas Day<sup>b,c</sup>, Peter Donnelly<sup>a,g</sup>,  
7 Swaine L. Chen<sup>h,i</sup>, Jeanne Salje<sup>b,c#</sup>

8

9 Wellcome Centre for Human Genetics, University of Oxford, Oxford, OX1 7BN, UK<sup>a</sup> ;

10 Mahidol-Oxford Tropical Medicine Research Unit, Faculty of Tropical Medicine, Mahidol  
11 University, Bangkok, Thailand<sup>b</sup> ;

12 Centre for Tropical Medicine and Global Health, Nuffield Department of Medicine,  
13 University of Oxford, Oxford, United Kingdom<sup>c</sup> ;

14 Swiss Tropical and Public Health Institute, Basel, Switzerland<sup>d</sup> ;

15 Faculty of Medicine, University Basel, Basel, Switzerland<sup>e</sup> ;

16 Pacific Biosciences, 1305 O'Brien Drive, Menlo Park, CA 94025, USA<sup>f</sup> ;

17 Department of Statistics, University of Oxford, Oxford, OX1 3TG, UK<sup>g</sup>

18 Department of Medicine, Division of Infectious Diseases, Yong Loo Lin School of Medicine,  
19 National University of Singapore, Singapore<sup>h</sup>

20 Genome Institute of Singapore, A\*STAR, Singapore 138672<sup>i</sup>

21

22

23 # Address correspondence to Jeanne Salje: [jeanne.salje@ndm.ox.ac.uk](mailto:jeanne.salje@ndm.ox.ac.uk)

24

25 **Abstract (250 words)**

26 **Background**

27 *Orientia tsutsugamushi* is a clinically important but neglected obligate intracellular bacterial  
28 pathogen of the Rickettsiaceae family that causes the potentially life-threatening human  
29 disease scrub typhus. In contrast to the genome reduction seen in many obligate  
30 intracellular bacteria, early genetic studies of *Orientia* have revealed one of the most  
31 repetitive bacterial genomes sequenced to date. The dramatic expansion of mobile  
32 elements has hampered efforts to generate complete genome sequences using short read  
33 sequencing methodologies, and consequently there have been few studies of the  
34 comparative genomics of this neglected species.

35

36 **Results**

37 We report new high-quality genomes of *Orientia tsutsugamushi*, generated using PacBio  
38 single molecule long read sequencing, for six strains: Karp, Kato, Gilliam, TA686, UT76 and  
39 UT176. In comparative genomics analyses of these strains together with existing reference  
40 genomes from Ikeda and Boryong strains, we identify a relatively small core genome of 657  
41 genes, grouped into core gene 'islands' and separated by repeat regions, and use the core  
42 genes to infer the first whole-genome phylogeny of *Orientia*.

43

44 **Conclusions**

45 Complete assemblies of multiple *Orientia* genomes verify initial suggestions that these are  
46 remarkable organisms. They have large genomes with widespread amplification of repeat  
47 elements and massive chromosomal rearrangements between strains. At the gene  
48 level, *Orientia* has a relatively small set of universally conserved genes, similar to other  
49 obligate intracellular bacteria, and the relative expansion in genome size can be accounted  
50 for by gene duplication and repeat amplification. Our study demonstrates the utility of long  
51 read sequencing to investigate complex bacterial genomes and characterise genomic  
52 variation.

53

54

55 **Keywords (3-10)**

56 *Orientia tsutsugamushi*, Rickettsiales, comparative genomics, PacBio, long read sequencing

57 **Introduction**

58 **Background**

59 *Orientia tsutsugamushi* is an obligate intracellular bacterial pathogen of the order  
60 Rickettsiales, family Rickettsiaceae which causes the life-threatening human disease scrub  
61 typhus. *Orientia* is transmitted by *Leptotrombidium* mites that occasionally feed on humans  
62 during the larval stage of development (“chiggers”), inoculate bacteria into the skin, and  
63 initiate infection. *Orientia* is maintained in mite populations by transovarial transmission.  
64 The mites normally feed only once on a vertebrate host, and cannot transmit bacteria  
65 directly from one host to another (Coleman et al., 2003). Bacteria propagate within  
66 endothelial cells, dendritic cells and monocytes at the site of inoculation, sometimes  
67 resulting in a visible red skin feature called an eschar (Paris et al., 2012). Bacteria  
68 subsequently spread through the endothelial and lymphatic system to cause a systemic  
69 infection characterised by lymphadenopathy, headache, fever, rash and myalgia, which  
70 typically begin 7-10 days after inoculation. The non-specificity of these symptoms makes  
71 scrub typhus difficult to diagnose based purely on clinical observations, and this is an  
72 important reason why the prevalence of scrub typhus has been historically under-  
73 recognised. Scrub typhus has now been shown to be a leading cause of severe fever and  
74 sepsis in studies in Thailand, India, China, Laos and Myanmar (Luce-Fedrow et al., 2018) and  
75 untreated or severe cases are associated with CNS infection, morbidity and death (Bonell et  
76 al., 2017; Dittrich et al., 2015). Locally acquired cases of scrub typhus have been reported in  
77 South America and the Middle East (Izzard et al., 2010; Weitzel et al., 2016), suggesting that  
78 the global burden of this disease may stretch beyond the traditionally known endemic areas  
79 of Asia and Northern Australia (Luce-Fedrow et al., 2018).

80

81 *Orientia tsutsugamushi* (previously *Rickettsia tsutsugamushi*), is distinct from other  
82 members of the Rickettsiaceae. The genus *Orientia* currently includes two known species, *O.*  
83 *tsutsugamushi* and *O. chuto*, the latter represented to date by a single strain isolated from a  
84 patient with a febrile illness contracted in Dubai (Izzard et al., 2010). High antigenic diversity  
85 among strains of *Orientia tsutsugamushi* is reflected in the poor immunological protection  
86 that recovered patients exhibit towards strains different from their original infection and,  
87 combined with a complex immune response that involves both humoral and cell-mediated  
88 immunity, this has hampered efforts towards vaccine development.

89

90 Despite its importance as a pathogen, few genomic analyses of *O. tsutsugamushi* have been  
91 published. The first whole genome sequence, Boryong, (Cho et al., 2007) reported a  
92 proliferation of type IV secretion systems in a repeat-dense genome of which 37.1%  
93 comprised identical repeats. A comparison of Boryong and the second complete genome,  
94 Ikeda (Nakayama et al., 2008), revealed similar repeats present in each genome, dominated  
95 by an integrative element named the *Orientia tsutsugamushi* amplified genetic element  
96 (OTage), and identified a core genome of 520 genes shared between the two *O.*  
97 *tsutsugamushi* strains and the 5 available sequences of other *Rickettsia* (Nakayama et al.,  
98 2010). Extensive genomic reshuffling was thought to have been mediated by amplification  
99 of repetitive sequences.

100

101 In comparison to other *Rickettsiae*, many of which have small and extremely stable  
102 genomes, *Orientia tsutsugamushi* has a large genome with an extraordinary proliferation of  
103 repeat sequences and conjugative elements. Some of the conjugative elements present in  
104 multiple copies across the genome are homologues of a gene cluster found in a single copy  
105 in *Rickettsia bellii*. Many of the genes in these elements are fragmented, suggesting they are  
106 non-functional (Darby et al., 2007). Other intracellular pathogens also contain repetitive  
107 elements, such as the mobile genetic elements in *Wolbachia* (Wu et al., 2004) and the  
108 tandem intergenic repeats in *Ehrlichia ruminantum* (Frutos et al., 2006). These mechanisms  
109 may evolve to increase genetic variability and aid immune evasion in bacteria which cannot  
110 easily take up novel DNA.

111

112 Larger collections of *O. tsutsugamushi* strains have been extensively studied using MLST and  
113 sequence typing of the *groES* and *groEL* (Arai et al., 2013) genes, and the outer membrane  
114 proteins 47kDa (also called HtrA or TSA47) (Jiang et al., 2013) and 56kDa (also called OmpA  
115 or TSA56) (Lu et al., 2010) genes. The 56kDa and 47kDa genes are highly immunogenic in  
116 human patients and animal models and have long been investigated as candidates for  
117 vaccine design, but high levels of diversity between strains, especially in the 56kDa gene,  
118 have limited the potential of developing a universal vaccine based on these epitopes.

119

120 Multiple studies in South East Asia have looked at the diversity of strains by MLST and  
121 56kDa typing, and shown a high level of diversity, with many MLSTs unique to an individual  
122 strain (Duong et al., 2013; Phetsouvanh et al., 2015; Sonthayanon et al., 2010;  
123 Wongprompitak et al., 2015). Work in Thailand and Laos has shown recombination between  
124 MLSTs, as well as evidence for multiple infections in individual patients, implying that  
125 multiple strains may co-exist in mites (Sonthayanon et al., 2010). Comparisons of *56kDa*  
126 typing with MLST (Sonthayanon et al., 2010) and *47kDa* (Jiang et al., 2013) also show low  
127 congruence between methods, suggesting that single gene typing of *Orientia* may not  
128 represent the true relationships between strains; by extension, a 7-gene MLST scheme may  
129 not capture the full set of genomic relationships among strains.

130  
131 Attempts to generate complete *Orientia tsutsugamushi* genomes by whole genome  
132 sequencing have been limited by the difficulties of sequencing and assembling a repeat-  
133 dense genome, and no further genomes have been completed since the Boryong and Ikeda  
134 genomes in 2008. Current draft assemblies are fragmented with over 50 contigs per  
135 genome, and vary in size – the two assemblies of the genome of *Orientia tsutsugamushi* str.  
136 Karp available on Genbank are 1,459,958bp  
137 (<https://www.ebi.ac.uk/ena/data/view/LANM01000000>) and 2,022,909bp  
138 (<https://www.ncbi.nlm.nih.gov/nuccore/LYMA00000000>; Liao et al., 2017) in length,  
139 suggesting that assemblies are either incomplete, or have problems caused by the  
140 misassembly of repeats or the inclusion of contaminating sequences.

141  
142 In this work, we have used Pacific Biosciences long-read sequencing to assemble six  
143 complete genomes of *Orientia tsutsgamushi* strains representing a range of geographical  
144 origins and serotypes. From this, we gain new insights into potential mechanisms underlying  
145 the characteristic antigenic diversity of *Orientia*, which may contribute to its widespread  
146 prevalence among humans. Finally, this expanded genomic perspective will contribute to  
147 our understanding of the phylogeography and epidemiology of this species, as well as  
148 contribute to more detailed studies of virulence mechanisms.

149

150 **Methods**

151

152 **Bacterial propagation**

153 All experiments were performed using *O. tsutsugamushi* grown in the mouse fibroblast cell  
154 line L929. Uninfected L929 cells were grown in 25 cm<sup>2</sup> and 75 cm<sup>2</sup> plastic flasks at 37 °C and  
155 5% CO<sub>2</sub>, using DMEM or RPMI 1640 (Thermo Fisher Scientific) media supplemented with  
156 10% FBS (Sigma) as described previously (Giengkam et al 2015). Infected L929 cells were  
157 grown in the same way, but at 35 °C. Frozen stocks of bacteria were grown for 5 days, then  
158 the bacterial content was calculated using qPCR against the bacterial gene TSA47 (Giengkam  
159 et al., 2015). Bacteria were isolated onto fresh L929 cells in 75 cm<sup>2</sup> flasks at an Multiplicity  
160 of Infection of 10:1 and then grown for an additional 7 days. At this point bacteria were  
161 isolated from host cells and prepared for DNA extraction.

162

163 **DNA extraction**

164 The supernatant was removed from infected flasks and replaced with 6-8 ml pre-warmed  
165 media. Infected cells were harvested by mechanical scraping and then lysed using a bullet  
166 blender (BBX24B, Bullet Blender Blue, Nextadvance USA) operated at power 8 for 1 min.  
167 Host cell debris was removed by centrifugation at 300xg for 3 minutes, and the supernatant  
168 was filtered through a 2.0 µm filter unit. 10 µl of 1.4 µg/µl DNase (Deoxyribonuclease I from  
169 bovine pancreas, Merck, UK) was added per 1 ml of bacterial solution, then incubated at  
170 room temperature for 30 minutes. This procedure removed excess host cell DNA. The  
171 bacterial sample was then isolated by centrifugation at 14,000xg for 10 min at 4 °C, and  
172 washed two times with 0.3M sucrose (Merck, UK). After the washing steps were completed  
173 DNA was extracted using a QIAGEN Dneasy Blood & Tissue Kit (QIAGEN, UK) following the  
174 manufacturer's instructions.

175 Purified DNA samples were analysed by gel electrophoresis using 0.8% agarose gel, in order  
176 to assess the DNA integrity. The yield of genomic DNA was quantified using a nanodrop  
177 (Nanodrop™ 2000, Thermo Scientific, UK) and Qubit Fluorometric Quantitation (Qubit™ 3.0  
178 Fluorometer, Thermo Scientific, UK).

179

180 **Sequencing**

181 SMRTBell templates were prepared from purified *Orientia* genomic DNA according to  
182 PacBio's recommended protocols. Briefly, 20kb libraries were targeted; enrichment for large  
183 fragments was done using BluePippin (Sage Science) size selection method or successive  
184 Ampure (Beckman Coulter) clean-ups, depending on the original DNA size distribution and  
185 quantity, as recommended by PacBio. SMRTBell templates were sequenced on a Pacific  
186 Biosciences RSII Sequencer using P6 chemistry with a 240min run time. An average of 1.05  
187 Gb of raw sequence was collected per strain (range 0.3-2.4 Gb), with an average N50 read  
188 length of 28.5 Kb (range 10.6-41.5 Kb). Genomes were assembled using the  
189 RS\_HGAP\_Assembly.3 protocol from the PacBio SMRTPortal (version 2.3.0), with initial  
190 polishing performed on trimmed initial assemblies using the same raw sequencing data with  
191 the RS\_Resequencing.1 protocol. Each assembly was further polished using paired-end  
192 reads sequenced on an Illumina Miseq machine. Sequencing information and Illumina data  
193 availability for each sample can be found in Table S1; PacBio data is available under EBI  
194 accession PRJEB24834. For each assembly, the corresponding Illumina reads were aligned to  
195 the PacBio assembly using Stampy v1.0.23 (Lunter and Goodson, 2010). Pilon v1.16 (Walker  
196 et al., 2014) was then used to generate a final genome, and corrected 2 to 265 errors in the  
197 assemblies, with the majority of the errors being single base deletions at the end of A or T  
198 homopolymer runs. All genomes were rotated and reverse complemented as needed so  
199 that the predicted start codon for the *dnaA* gene formed the first nucleotide in the genome  
200 sequence. Sequencing and assembly statistics can be found in Table 2.

201

202 The Boryong, Ikeda, and non-*Orientia* Rickettsial genomes used in this study were obtained  
203 from NCBI (Table S2).

204

205 The finished assemblies were annotated using Prokka v1.11 (Seemann, 2014) , using a  
206 custom database created from the Boryong and Ikeda strains, which were previously  
207 annotated using the NCBI prokaryotic annotation pathway. The Boryong and Ikeda strains  
208 were re-annotated using Prokka for consistency with the other samples. Short gene names  
209 for all non-hypothetical gene products were checked manually (607 products). Where genes  
210 names were present for Boryong and/or Ikeda a consensus name based on these was  
211 selected. Where no short name was available, the long gene name was searched for in *E.*  
212 *coli* using the UniProt database, and where a single and unambiguous match was selected

213 this was used. In cases of ambiguity the protein sequence from *Orientia* was used in a BLAST  
214 search against *E. coli*, *R. rickettsii* and *H. sapiens* and the short name of the closest match  
215 was selected. The key *Orientia* genes *TSA56*, *TSA47*, *TSA22*, *ScaA*, *ScaC*, *ScaD*, and *ScaE* were  
216 also manually annotated by taking known protein sequences from the UT76 strain and using  
217 BLAST to find the homologous genes in the other strains and give them the correct names.  
218 The single contig genomes were rotated to begin with the *DnaA* gene.

219

220 Repetitive regions of the genome were defined as regions of at least 1000bp in length which  
221 had a match with another 1000bp region with up to 100 differences (mismatches,  
222 insertions, and deletions) allowed. The repetitive regions were identified with Vmatch  
223 (Abouelhoda et al., 2004).

224

225 The core and accessory genome was identified using Roary (Page et al., 2015) with a  
226 threshold of 80% sequence identity required to consider two sequences part of the same  
227 gene group. Core genes were defined as genes present in every sample and as a single copy  
228 in every sample. The accessory genes identified using Roary were re-clustered using CD-Hit  
229 (Fu et al., 2012; Li and Godzik, 2006) with a cutoff of 80% identity across 95% of the length  
230 of the shortest protein to identify accessory genes which were truncated copies of other  
231 proteins. The correlation between gene order in each pair of samples was calculated by  
232 taking the order of the genes relative to the Karp strain and calculating the Spearman's rank  
233 coefficient between each pair. COG categories were assigned using RPS-BLAST to find  
234 matches in the NCBI Conserved Domain Database (Marchler-Bauer et al., 2002) and  
235 assigning a COG category to these using cdd2cog (Leimbach, 2016). Core repeat genes were  
236 identified using protein clusters generated by CD-Hit to find gene groups which were  
237 present at more than 1 copy. The clusters were identified using CD-Hit on the proteins  
238 predicted by Prokka with a cutoff of 80% identity across 90% of the length of the shortest  
239 protein. Pseudogenes were identified from CD-Hit protein clusters where at least one  
240 protein was a truncated version of the longest protein in the group. As pseudogenes which  
241 are truncated at the 5' end will not be annotated by Prokka, BLAST (Altschul et al., 1997)  
242 was used to screen for any additional pseudogenes in non-genic regions by searching for  
243 BLAST hits with protein identity  $\geq 80\%$  and an E-value  $< 10^{-15}$ . This method found a further  
244 26-37 pseudogenes per strain.



245

246 Further analysis used BioPython (Cock et al., 2009) and the GenomeDiagram package  
247 (Pritchard et al., 2006). Figure 1 was created with Circos (Krzywinski et al., 2009). Statistical  
248 tests were carried out in R (R Core Team, 2014) and the Python SciPy library (Jones et al.).

249 Phylogenies were inferred using Maximum Likelihood methods in RaxML (Stamatakis, 2014)  
250 under the GAMMA model of rate heterogeneity and bootstrap values calculated using the  
251 rapid bootstrap method. The input sequences were aligned with Clustal Omega (Sievers et  
252 al., 2011) (for the 56kDa/46kDa/MLST trees) or using the MAFFT alignments produced by  
253 Roary (for the core gene tree). Phylogenetic trees were drawn using the ape (Paradis et al.,  
254 2004) and phytools (Revell, 2012) R packages, and Robinson-Foulds distances were  
255 calculated using the phangorn (Schliep, 2011) R package.

256

257 **Results**

258

259 **Sequencing, Assembly, and Annotation**

260 Eight genomes were assembled using the PacBio reads to perform initial genome assembly  
261 and Illumina sequencing reads to polish the genomes and reduce errors. Six of the eight  
262 genomes could be assembled into a single finished contig, while two genomes remain in  
263 multiple contigs. In addition, two previously assembled reference genomes, *Orientia*  
264 *tsutsugamushi* str. Boryong and *Orientia tsutsugamushi* str. Ikeda, were incorporated into  
265 our analysis. The genome size ranges from 1.93Mb to 2.47Mb, and the GC content for all  
266 strains is consistent at 30-31%. We assessed the genomes to identify core genes shared  
267 between all genomes, and look for repetitive regions and repeat genes in each strain.  
268 Figure 1 plots the genetic elements of each complete genome.

269 The number of predicted genes in each strain ranges from 2086 (UT176) to 2709 (Gilliam)  
270 and is highly correlated with genome size (Spearman's correlation coefficient 0.94,  $p <$   
271  $2.2 \times 10^{-16}$ ). A function could not be assigned, by similarity to reported sequences, to 325-547  
272 genes (16 to 22 % of the identified coding regions) in each strain.

## 273 **Core genome analysis**

274

275 The set of 8 complete, single-contig genomes was used to identify core genes (present in all  
276 genomes) and accessory genes (present in a subset of genomes), using the criterion that all  
277 members of a group of putative orthologues should be at least 80% identical (similar) to all  
278 other members of the group. While the unfinished genomes do not appear to have lower  
279 numbers of predicted genes, which might indicate the assembly is incomplete, for this  
280 analysis the two strains which assembled as multiple contigs were excluded to avoid  
281 excluding core genes which are missing from the unfinished assemblies. A total of 657 gene  
282 groups were present in all 8 strains and therefore form a putative core genome, while 2812  
283 gene groups were present in 2-7 of the 8 strains, and a further 4687 gene groups were  
284 found in a single strain. The 657 core genes make up 28-35% of the genome of each strain  
285 (Table S3). The number of core gene groups does not continue to decrease as more  
286 genomes are added to the analysis, suggesting that the core genome of *Orientia* can be  
287 defined with 8 representative genomes. In the initial analysis with Roary, the total number  
288 of gene groups continues to grow, suggesting an open pan-genome, but observation of the  
289 7499 accessory gene groups showed that of the 6050 groups where a function can be  
290 assigned to one or more gene, there are only 122 distinct gene products, many of them  
291 conjugal transfer proteins, transposases, DNA helicases, and other functions shared by  
292 genes known to be part of the *Orientia tsutsugamushi* amplified genetic element identified  
293 in the Ikeda strain (Nakayama et al., 2008). Re-clustering these accessory genes but allowing  
294 genes which are only a match to part of a gene sequence to cluster together to include  
295 more truncated and fragmented copies of genes shows that the number of accessory gene  
296 groups continues to increase, but at a slower rate (Figure S1). The number of gene products  
297 remains constant at 122 no matter how many strains are included in the analysis. This  
298 suggests that the increase in non-core gene clusters is mainly due to further duplication and  
299 truncation of existing genes, rather than by the import of novel genes.

300

## 301 **Genome Synteny**

302 With the completed genomes produced by long read sequencing, the synteny of the  
303 genomes can be investigated. Previous work on the Boryong and Ikeda genomes showed  
304 extensive genome shuffling between the two strains. Analysis of the order and grouping of

305 the core genes which are conserved in each genome shows that the genome has undergone  
306 massive rearrangement, with the core genes found in core gene 'islands' with repeat  
307 regions interspersed between these islands. The 657 core genes are present in 145-157  
308 distinct islands, of which only 51 are conserved (defined as the same genes present in the  
309 same order) in all genomes. Figure 3 shows the position and ordering of these conserved  
310 core gene islands which are maintained in all samples relative to the position and ordering  
311 in the Karp strain. The correlation between gene order in each pair of samples is shown in  
312 Figure S2. A value close to 0 shows low correlation in gene order, while values closer to 1  
313 show higher correlation in gene order. As there are differences in the correlation of gene  
314 order between strains, this suggests that the process of genome rearrangement is  
315 happening in multiple steps and not as a single event.

316

317 The identities of genes present on conserved islands is shown in table S5. Conserved islands  
318 range from 1-13 genes in size, with larger islands often containing genes linked by plausible  
319 biological functions. For example, groups 3 and 6 include a number of cell division and  
320 peptidoglycan biosynthesis genes (including *mraY*, *murF*, *murE*, *pbp*, *ftsL*, *dnaJ* and *dnaK* in  
321 group 3 and *murC*, *murB*, *ddl* and *ftsQ* in group 6) and groups 31 and 32 include a number of  
322 30S and 50S ribosomal proteins. Analysis of the number of conserved islands shared  
323 between samples shows that the number of conserved islands continues to decrease as  
324 more genomes are included (Figure S3), and suggests that gene order and clustering is not  
325 always constrained in *Orientia tsutsugamushi*. There is no difference seen in the size of the  
326 islands between conserved and non-conserved islands (Figure S4) (two-sample Kolmogorov-  
327 Smirnov test  $D=0.085$ ,  $p\text{-value}=0.86$ ), the nucleotide diversity between genes in the two  
328 categories of islands (Figure S5) (two-sample Kolmogorov-Smirnov test  $D=0.052$ ,  $p\text{-}$   
329  $\text{value}=0.86$ ), or the Clusters of Orthologous Groups (COG) categories assigned to genes in  
330 the two island categories (Chi-squared test  $\chi^2= 15.03$ ,  $p=0.82$ ).

331

### 332 **Repeats and pseudogenes**

333 The genomes of *Orientia tsutsugamushi* are known to be highly repetitive, including a highly  
334 amplified genetic element known as the *Orientia tsutsugamushi* amplified genetic element  
335 (Otag), as well as other transposable elements.

336 Our results emphasise the large number of repeated genes and regions, including many  
337 genes related to the Type IV secretion system. The total proportion of the genome which is  
338 repetitive (see Methods for our definition of repetitive) differs markedly from 33% in UT176  
339 to 51% in Gilliam (Table S3). In contrast, the extremely compact (and therefore non-  
340 repetitive) *Rickettsia typhi* genome is 0% repetitive by our measure and even, intriguingly,  
341 the *Rickettsia* endosymbiont of *Ixodes scapularis*, known to encode multiple copies of the  
342 same repetitive element found in *Orientia* (Gillespie et al., 2012), is 20% repetitive in our  
343 analysis, despite our methods giving more conservative figures than previously determined  
344 for the Ikeda strain (Nakayama et al., 2008).

345 We identified 530 groups of repeat genes containing 12043 genes present in multiple copies  
346 in at least one strain, which we term “core repeats”. Of the 530 groups, 427 represent genes  
347 found in multiple strains, which 103 are found only in a single strain. Despite clustering in  
348 530 groups, the genes have only 66 different functional products, as is expected from the  
349 earlier results looking at all the non-core genes. The repeat genes are mainly transposase  
350 and conjugal transfer genes, similar to those previously reported in the Otage (Table S6),  
351 and cluster into genetic elements which are interspersed between the core genes. Many of  
352 these genes are present in high copy number, with all strains carrying over 200 transposases  
353 and 300 conjugal transfer genes and gene fragments. These core repeat elements occupy  
354 35-47% of the *Orientia tsutsugamushi* genome and represent 57-67% of the genes in these  
355 genomes (Table S4).

356

357 *Orientia tsutsugamushi* genes are known to exhibit high levels of pseudogenisation and  
358 gene decay. We searched for pseudogenes in each genome, and identified up to 484  
359 pseudogenes per strain (Table S7). This is lower than previously reported in Ikeda, but due  
360 to methodological differences the figures cannot be directly compared. We also assessed  
361 whether the pseudogene had been caused by truncation at the 5’ or 3’ end of the  
362 sequencing, or by frameshift.

363

### 364 **Phylogenetics**

365 A phylogenetic tree was constructed using the core genes from each strain. This can be  
366 compared to trees built using the 56kDa (Figure 4) and 47kDa (Figure S6) genes, which are  
367 often used for phylogenetic analysis of *Orientia tsutsugamushi*, or to trees built using the

368 MLST genes (Figure S7). *Orientia* strains are commonly based on their similarity to reference  
369 strains, either from phylogenetics or serology. Compared to the 56kDa tree, the core gene  
370 tree suggests the Kato and Ikeda strains are more closely related to the Karp, UT176, and  
371 UT76 strains than the TA686 and Gilliam strains (Figure 4). Robinson-Foulds distances  
372 between trees are shown in Table S8; for this small number of strains, the distance is lowest  
373 between the 47kDa tree and the core genome tree.

374

## 375 **Discussion**

376 We present the first large-scale study of *Orientia tsutsugamushi*, a bacterium which is  
377 important both for the study of human disease and for its unique insights into genome  
378 evolution.

379 Previous studies of *Orientia tsutsugamushi* genomes have used BAC cloning and Sanger  
380 sequencing to produce complete genomes (Cho et al., 2007; Nakayama et al., 2008), or have  
381 used next-generation sequencing strategies which have produced only incomplete and  
382 fragmented genomes (Liao et al., 2017). We demonstrate that a combination of PacBio and  
383 Illumina sequencing is sufficient to produce a single-contig genome, allowing us to study the  
384 gene content and synteny of this organism. For the two genomes which could not be  
385 assembled into single contigs in our study (FPW1038 and TA763), we found that the  
386 sequencing produced fewer reads at the high end of the length distribution. This suggests  
387 that given the highly repetitive nature of the *Orientia tsutsugamushi* genome, the DNA  
388 preparation and sequencing methods must be carefully chosen to produce very long reads  
389 in order to produce complete assemblies. We used Illumina sequencing to correct errors in  
390 our genomes, which was vital to reduce the number of homopolymer errors, which could  
391 otherwise suggest frameshift errors and affect gene annotation. While the fewest errors we  
392 corrected in a strain was two, this is likely an underestimate as errors in repetitive regions  
393 where Illumina reads cannot map are impossible to correct. While our analysis shows small  
394 differences when quantifying the extent of the repeat regions and repeat gene families in  
395 *Orientia* compared to previous work, a direct comparison is difficult due to differences in  
396 methodology between analyses.

397 Owing to the difficulties of producing complete genomes, most previous work has relied on  
398 single gene or MLST studies to investigate the genetic diversity of *Orientia tsutsugamushi*.  
399 We demonstrate that phylogenies generated from limited data are substantially different  
400 from those produced from the whole core genome. The common practice of grouping  
401 *Orientia* strains into ‘Karp-like’ or ‘Gilliam-like’ groups based on the genotype of the 56kDa  
402 antigen may not give an accurate view of the relatedness of these strains, especially when  
403 recombination is taken into account, although this may still be important when considering  
404 immune response.

405 Previous work has demonstrated limited synteny between the two reference strains of  
406 *Orientia tsutsugamushi*, but we extend this to demonstrate that there is minimal synteny  
407 between any known *Orientia tsutsugamushi* genome. The pattern of core gene islands  
408 separated by transposable elements and repeats suggests a repeat-mediated system of  
409 chromosome rearrangement. It is unclear whether this is a gradual process of genome  
410 rearrangement, or whether the genome is being broken apart and rearranged rapidly,  
411 similar to chromothripsis or the chromosome repair of *Deinococcus radiodurans* after  
412 exposure to ionizing radiation. In *Deinococcus*, it is thought that RecFOR pathway is  
413 particularly important for DNA repair, and it has no homologues to RecB or RecC (Cox et al.,  
414 2010). Similarly, in *Orientia*, the core genome does not contain RecB or RecC, but does  
415 contain the RecFOR pathway genes, indicating this alternative DNA repair pathway may also  
416 be important. Longitudinal studies of *Orientia tsutsugamushi* genomes during passage or  
417 infection may be needed to determine the speed and processes of genome rearrangement  
418 in *Orientia*.

419 We report a core genome of only 657 genes, compared to the 519 previously reported as  
420 the core genome shared between *Orientia* and five other sequenced *Rickettsia*, despite  
421 using a relatively low sequence identity threshold to determine gene clusters. Differences in  
422 methodology may lead to the reporting of different core gene sets, but more interesting is  
423 the pattern of core genome islands separated by amplified repeat regions, and the lack of  
424 conservation in the ordering and clustering of the core genes.

425 All of the *Orientia* genomes show high repetitiveness, which we measured as both non-  
426 unique regions of the genome, and genes which are present in multiple copies (some of

427 which may be truncated). The genomes of intracellular bacteria tend towards genome  
428 reduction and gene loss (Darby et al., 2007; Merhej and Raoult, 2011), but maintain  
429 degraded genes and accumulate non-coding DNA. The transition to intracellularity has been  
430 hypothesized to lead to the relaxation of selective pressure on the genome (Moran, 1996),  
431 with an increased rate of sequence evolution. The expansion of the Otago (and other mobile  
432 elements) throughout the *Orientia* lineage appears to be another consequence of relaxed  
433 selection on *Orientia* in its intracellular niche, again leading to accelerated sequence  
434 evolution of the genome through rearrangement and gene loss. This is supported by the  
435 finding that the diversity of gene repertoire between strains of *Orientia tsutsugamushi* is  
436 largely due to the duplication and truncation of existing genes, and we find no evidence for  
437 the acquisition of new genetic material via horizontal transfer . The amplification of a  
438 transposable element has been seen in Rickettsial (Gillespie et al., 2012) and non-Rickettsial  
439 (Wiens et al., 2008) species, but it is not known whether this is associated with  
440 rearrangement of the genome in other species.

441 In conclusion, we report the generation of six complete and a further two draft genomes  
442 from a diverse set of strains of the important but neglected human pathogen *Orientia*  
443 *tsutsugamushi*. This set includes the major reference strains Karp, Kato and Gilliam, and will  
444 serve as a valuable resource for scientists and clinicians studying this pathogen, in particular  
445 supporting future work on *Orientia* genomics, vaccine development, and cell biology. The  
446 new genomes reported here confirm the status of *Orientia* as one of the most fragmented  
447 and highly repeated bacterial genomes known, and exciting questions remain regarding the  
448 mechanisms and timeframes driving the evolution of these extraordinary genomes.

449



450 **Conflict of Interest**

451 P.D. is Founder, Director, and Executive Officer of Genomics plc and a Partner of Peptide  
452 Groove LLP.

453

454 **Data Availability**

455 Sequence data and assemblies generated in this study have been uploaded to the EBI under  
456 project PRJEB24834.

457

458 **Author Contributions**

459

460 **Acknowledgements and Funding**

461 J.S. was funded by a Royal Society Dorothy Hodgkin Research Fellowship. P.D. is supported  
462 by a Wellcome Trust Core Award (090532/Z/09/Z).

463

464

465 **References**

466 Abouelhoda, M.I., Kurtz, S., and Ohlebusch, E. (2004). Replacing suffix trees with enhanced  
467 suffix arrays. *J. Discret. Algorithms* 2, 53–86.

468 Altschul, S.F., Madden, T.L., Schäffer, A.A., Zhang, J., Zhang, Z., Miller, W., and Lipman, D.J.  
469 (1997). Gapped {BLAST} and {PSI-BLAST:} a new generation of protein database search  
470 programs. *Nucleic Acids Res.* 25, 3389–3402.

471 Arai, S., Tabara, K., Yamamoto, N., Fujita, H., Itagaki, A., Kon, M., Satoh, H., Araki, K., Tanaka-  
472 Taya, K., Takada, N., et al. (2013). Molecular phylogenetic analysis of *Orientia tsutsugamushi*  
473 based on the groES and groEL genes. *Vector Borne Zoonotic Dis.* 13, 825–829.

474 Blacksell, S.D., Luksameetanasan, R., Kalambaheti, T., Aukkanit, N., Paris, D.H., McGready,  
475 R., Nosten, F., Peacock, S.J., and Day, N.P.J. (2008). Genetic typing of the 56-kDa type-  
476 specific antigen gene of contemporary *Orientia tsutsugamushi* isolates causing human scrub  
477 typhus at two sites in north-eastern and western Thailand. *FEMS Immunol. Med. Microbiol.*  
478 52, 335–342.

479 Bonell, A., Lubell, Y., Newton, P.N., Crump, J.A., and Paris, D.H. (2017). Estimating the  
480 burden of scrub typhus: A systematic review. *PLoS Negl. Trop. Dis.* 11, e0005838.

481 Cho, N.-H., Kim, H.-R., Lee, J.-H., Kim, S.-Y., Kim, J., Cha, S., Kim, S.-Y., Darby, A.C., Fuxelius,  
482 H.-H., Yin, J., et al. (2007). The *Orientia tsutsugamushi* genome reveals massive proliferation  
483 of conjugative type IV secretion system and host-cell interaction genes. *Proc. Natl. Acad. Sci.*  
484 U. S. A. 104, 7981–7986.

485 Cock, P.J.A., Antao, T., Chang, J.T., Chapman, B.A., Cox, C.J., Dalke, A., Friedberg, I.,  
486 Hamelryck, T., Kauff, F., Wilczynski, B., et al. (2009). Biopython: freely available Python tools  
487 for computational molecular biology and bioinformatics. *Bioinformatics* 25, 1422–1423.

488 Coleman, R.E., Monkanna, T., Linthicum, K.J., Strickman, D.A., Frances, S.P., Tanskul, P.,  
489 Kollars, T.M., Inlao, I., Watcharapichat, P., Khlainanee, N., et al. (2003). Occurrence of  
490 *Orientia tsutsugamushi* in small mammals from Thailand. *Am. J. Trop. Med. Hyg.* 69, 519–  
491 524.

492 Cox, M.M., Keck, J.L., and Battista, J.R. (2010). Rising from the Ashes: DNA Repair in  
493 *Deinococcus radiodurans*. *PLoS Genet.* 6, e1000815.

494 Darby, A.C., Cho, N.-H., Fuxelius, H.-H., Westberg, J., and Andersson, S.G.E. (2007).  
495 Intracellular pathogens go extreme: genome evolution in the Rickettsiales. *Trends Genet.*  
496 23, 511–520.

- 497 Dittrich, S., Rattanavong, S., Lee, S.J., Panyanivong, P., Craig, S.B., Tulsiani, S.M., Blacksell,  
498 S.D., Dance, D.A.B., Dubot-Pérès, A., Sengduangphachanh, A., et al. (2015). *Orientia*,  
499 *rickettsia*, and *leptospira* pathogens as causes of CNS infections in Laos: a prospective study.  
500 *Lancet. Glob. Heal.* *3*, e104-12.
- 501 Duong, V., Blassdell, K., May, T.T.X., Sreyrath, L., Gavotte, L., Morand, S., Frutos, R., and  
502 Buchy, P. (2013). Diversity of *Orientia tsutsugamushi* clinical isolates in Cambodia reveals  
503 active selection and recombination process. *Infect. Genet. Evol.* *15*, 25–34.
- 504 Enatsu, T., Urakami, H., and Tamura, A. (1999). Phylogenetic analysis of *Orientia*  
505 *tsutsugamushi* strains based on the sequence homologies of 56-kDa type-specific antigen  
506 genes. *FEMS Microbiol. Lett.* *180*, 163–169.
- 507 Frutos, R., Viari, A., Ferraz, C., Morgat, A., Eychenié, S., Kandassamy, Y., Chantal, I., Bensaid,  
508 A., Coissac, E., Vachier, N., et al. (2006). Comparative genomic analysis of three strains of  
509 *Ehrlichia ruminantium* reveals an active process of genome size plasticity. *J. Bacteriol.* *188*,  
510 2533–2542.
- 511 Fu, L., Niu, B., Zhu, Z., Wu, S., and Li, W. (2012). CD-HIT: accelerated for clustering the next-  
512 generation sequencing data. *Bioinformatics* *28*, 3150–3152.
- 513 Giengkam, S., Blakes, A., Utsahajit, P., Chaemchuen, S., Atwal, S., Blacksell, S.D., Paris, D.H.,  
514 Day, N.P.J., and Salje, J. (2015). Improved Quantification, Propagation, Purification and  
515 Storage of the Obligate Intracellular Human Pathogen *Orientia tsutsugamushi*. *PLoS Negl.*  
516 *Trop. Dis.* *9*, e0004009.
- 517 Gillespie, J.J., Joardar, V., Williams, K.P., Driscoll, T., Hostetler, J.B., Nordberg, E., Shukla, M.,  
518 Walenz, B., Hill, C.A., Nene, V.M., et al. (2012). A *Rickettsia* genome overrun by mobile  
519 genetic elements provides insight into the acquisition of genes characteristic of an obligate  
520 intracellular lifestyle. *J. Bacteriol.* *194*, 376–394.
- 521 Izzard, L., Fuller, A., Blacksell, S.D., Paris, D.H., Richards, A.L., Aukkanit, N., Nguyen, C., Jiang,  
522 J., Fenwick, S., Day, N.P.J., et al. (2010). Isolation of a Novel *Orientia* Species (*O. chuto* sp.  
523 nov.) from a Patient Infected in Dubai. *J. Clin. Microbiol.* *48*, 4404–4409.
- 524 Jiang, J., Paris, D.H., Blacksell, S.D., Aukkanit, N., Newton, P.N., Phetsouvanh, R., Izzard, L.,  
525 Stenos, J., Graves, S.R., Day, N.P.J., et al. (2013). Diversity of the 47-kD HtrA nucleic acid and  
526 translated amino acid sequences from 17 recent human isolates of *Orientia*. *Vector Borne*  
527 *Zoonotic Dis.* *13*, 367–375.
- 528 Jones, E., Oliphant, T., Peterson, P., and others {SciPy}: Open source scientific tools for  
529 {Python}.
- 530 Krzywinski, M., Schein, J., Birol, I., Connors, J., Gascoyne, R., Horsman, D., Jones, S.J., and  
531 Marra, M.A. (2009). Circos: An information aesthetic for comparative genomics. *Genome*  
532 *Res.* *19*, 1639–1645.
- 533 Leimbach, A. (2016). *bac-genomics-scripts: Bovine E. coli mastitis comparative genomics*  
534 *edition*.
- 535 Li, W., and Godzik, A. (2006). Cd-hit: a fast program for clustering and comparing large sets  
536 of protein or nucleotide sequences. *Bioinformatics* *22*, 1658–1659.
- 537 Liao, H.-M., Chao, C.-C., Lei, H., Li, B., Tsai, S., Hung, G.-C., Ching, W.-M., and Lo, S.-C. (2017).  
538 Intraspecies comparative genomics of three strains of *Orientia tsutsugamushi* with different  
539 antibiotic sensitivity. *Genomics Data* *12*, 84–88.
- 540 Lu, H.-Y., Tsai, K.-H., Yu, S.-K., Cheng, C.-H., Yang, J.-S., Su, C.-L., Hu, H.-C., Wang, H.-C.,  
541 Huang, J.-H., and Shu, P.-Y. (2010). Phylogenetic analysis of 56-kDa type-specific antigen  
542 gene of *Orientia tsutsugamushi* isolates in Taiwan. *Am. J. Trop. Med. Hyg.* *83*, 658–663.
- 543 Luce-Fedrow, A., Lehman, M., Kelly, D., Mullins, K., Maina, A., Stewart, R., Ge, H., John, H.,

- 544 Jiang, J., and Richards, A. (2018). A Review of Scrub Typhus (*Orientia tsutsugamushi* and  
545 Related Organisms): Then, Now, and Tomorrow. *Trop. Med. Infect. Dis.* 3, 8.
- 546 Lunter, G., and Goodson, M. (2010). Stampy: A statistical algorithm for sensitive and fast  
547 mapping of Illumina sequence reads. *Genome Res.*
- 548 Marchler-Bauer, A., Panchenko, A.R., Shoemaker, B.A., Thiessen, P.A., Geer, L.Y., and Bryant,  
549 S.H. (2002). CDD: a database of conserved domain alignments with links to domain three-  
550 dimensional structure. *Nucleic Acids Res.* 30, 281–283.
- 551 McGready, R., Blacksell, S.D., Luksameetanasan, R., Wuthiekanun, V., Jedsadapanpong, W.,  
552 Day, N.P.J., and Nosten, F. (2010). First report of an *Orientia tsutsugamushi* type TA716-  
553 related scrub typhus infection in Thailand. *Vector Borne Zoonotic Dis.* 10, 191–193.
- 554 Merhej, V., and Raoult, D. (2011). Rickettsial evolution in the light of comparative genomics.  
555 *Biol. Rev. Camb. Philos. Soc.* 86, 379–405.
- 556 Moran, N.A. (1996). Accelerated evolution and Muller's ratchet in endosymbiotic bacteria.  
557 *Proc. Natl. Acad. Sci. U. S. A.* 93, 2873–2878.
- 558 Nakayama, K., Yamashita, A., Kurokawa, K., Morimoto, T., Ogawa, M., Fukuhara, M.,  
559 Urakami, H., Ohnishi, M., Uchiyama, I., Ogura, Y., et al. (2008). The Whole-genome  
560 sequencing of the obligate intracellular bacterium *Orientia tsutsugamushi* revealed massive  
561 gene amplification during reductive genome evolution. *DNA Res.* 15, 185–199.
- 562 Nakayama, K., Kurokawa, K., Fukuhara, M., Urakami, H., Yamamoto, S., Yamazaki, K., Ogura,  
563 Y., Ooka, T., and Hayashi, T. (2010). Genome comparison and phylogenetic analysis of  
564 *Orientia tsutsugamushi* strains. *DNA Res.* 17, 281–291.
- 565 Page, A.J., Cummins, C.A., Hunt, M., Wong, V.K., Reuter, S., Holden, M.T.G., Fookes, M.,  
566 Falush, D., Keane, J.A., and Parkhill, J. (2015). Roary: rapid large-scale prokaryote pan  
567 genome analysis. *Bioinformatics* 31, 3691–3693.
- 568 Paradis, E., Claude, J., and Strimmer, K. (2004). A{PE}: analyses of phylogenetics and  
569 evolution in {R} language. *Bioinformatics* 20, 289–290.
- 570 Paris, D.H., Aukkanit, N., Jenjaroen, K., Blacksell, S.D., and Day, N.P.J. (2009). A highly  
571 sensitive quantitative real-time PCR assay based on the *groEL* gene of contemporary Thai  
572 strains of *Orientia tsutsugamushi*. *Clin. Microbiol. Infect.* 15, 488–495.
- 573 Paris, D.H., Phetsouvanh, R., Tanganuchitcharnchai, A., Jones, M., Jenjaroen, K.,  
574 Vongsouvath, M., Ferguson, D.P.J., Blacksell, S.D., Newton, P.N., Day, N.P.J., et al. (2012).  
575 *Orientia tsutsugamushi* in human scrub typhus eschars shows tropism for dendritic cells and  
576 monocytes rather than endothelium. *PLoS Negl. Trop. Dis.* 6, e1466.
- 577 Phetsouvanh, R., Sonthayanon, P., Pukrittayakamee, S., Paris, D.H., Newton, P.N., Feil, E.J.,  
578 Day, N.P.J., Kurup, A., Issac, A., Loh, J., et al. (2015). The Diversity and Geographical  
579 Structure of *Orientia tsutsugamushi* Strains from Scrub Typhus Patients in Laos. *PLoS Negl.*  
580 *Trop. Dis.* 9, e0004024.
- 581 Pritchard, L., White, J.A., Birch, P.R.J., and Toth, I.K. (2006). GenomeDiagram: a python  
582 package for the visualization of large-scale genomic data. *Bioinformatics* 22, 616–617.
- 583 R Core Team (2014). R: A Language and Environment for Statistical Computing.
- 584 Revell, L.J. (2012). phytools: An R package for phylogenetic comparative biology (and other  
585 things). *Methods Ecol. Evol.* 3, 217–223.
- 586 Rights, F.L., and Smadel, J.E. (1948). Studies on scrub typhus; *tsutsugamushi* disease;  
587 heterogeneity of strains of *R. tsutsugamushi* as demonstrated by cross-vaccination studies.  
588 *J. Exp. Med.* 87, 339–351.
- 589 Schliep, K.P. (2011). phangorn: phylogenetic analysis in R. *Bioinformatics* 27, 592–593.
- 590 Seemann, T. (2014). Prokka: rapid prokaryotic genome annotation. *Bioinformatics* 30, 2068–

591 2069.

592 Sievers, F., Wilm, A., Dineen, D., Gibson, T.J., Karplus, K., Li, W., Lopez, R., McWilliam, H.,  
593 Remmert, M., Söding, J., et al. (2011). Fast, scalable generation of high-quality protein  
594 multiple sequence alignments using Clustal Omega. *Mol. Syst. Biol.* 7.

595 Sonthayanon, P., Peacock, S.J., Chierakul, W., Wuthiekanun, V., Blacksell, S.D., Holden,  
596 M.T.G., Bentley, S.D., Feil, E.J., and Day, N.P.J. (2010). High rates of homologous  
597 recombination in the mite endosymbiont and opportunistic human pathogen *Orientia*  
598 *tsutsugamushi*. *PLoS Negl. Trop. Dis.* 4, e752.

599 Stamatakis, A. (2014). RAxML version 8: a tool for phylogenetic analysis and post-analysis of  
600 large phylogenies. *Bioinformatics* 30, 1312–1313.

601 Walker, B.J., Abeel, T., Shea, T., Priest, M., Abouelliel, A., Sakthikumar, S., Cuomo, C.A., Zeng,  
602 Q., Wortman, J., Young, S.K., et al. (2014). Pilon: An Integrated Tool for Comprehensive  
603 Microbial Variant Detection and Genome Assembly Improvement. *PLoS One* 9, e112963.

604 Weitzel, T., Dittrich, S., López, J., Phuklia, W., Martinez-Valdebenito, C., Velásquez, K.,  
605 Blacksell, S.D., Paris, D.H., and Abarca, K. (2016). Endemic Scrub Typhus in South America. *N.*  
606 *Engl. J. Med.* 375, 954–961.

607 Wiens, G.D., Rockey, D.D., Wu, Z., Chang, J., Levy, R., Crane, S., Chen, D.S., Capri, G.R.,  
608 Burnett, J.R., Sudheesh, P.S., et al. (2008). Genome sequence of the fish pathogen  
609 *Renibacterium salmoninarum* suggests reductive evolution away from an environmental  
610 *Arthrobacter* ancestor. *J. Bacteriol.* 190, 6970–6982.

611 Wongprompitak, P., Duong, V., Anukool, W., Sreyrath, L., Mai, T.T.X., Gavotte, L., Moulia, C.,  
612 Cornillot, E., Ekpo, P., Suputtamongkol, Y., et al. (2015). *Orientia tsutsugamushi*, agent of  
613 scrub typhus, displays a single metapopulation with maintenance of ancestral haplotypes  
614 throughout continental South East Asia. *Infect. Genet. Evol.* 31, 1–8.

615 Wu, M., Sun, L. V, Vamathevan, J., Riegler, M., Deboy, R., Brownlie, J.C., McGraw, E.A.,  
616 Martin, W., Esser, C., Ahmadinejad, N., et al. (2004). Phylogenomics of the Reproductive  
617 Parasite *Wolbachia pipientis* wMel: A Streamlined Genome Overrun by Mobile Genetic  
618 Elements. *PLoS Biol.* 2, e69.

619

620

621 **Figures and Tables**

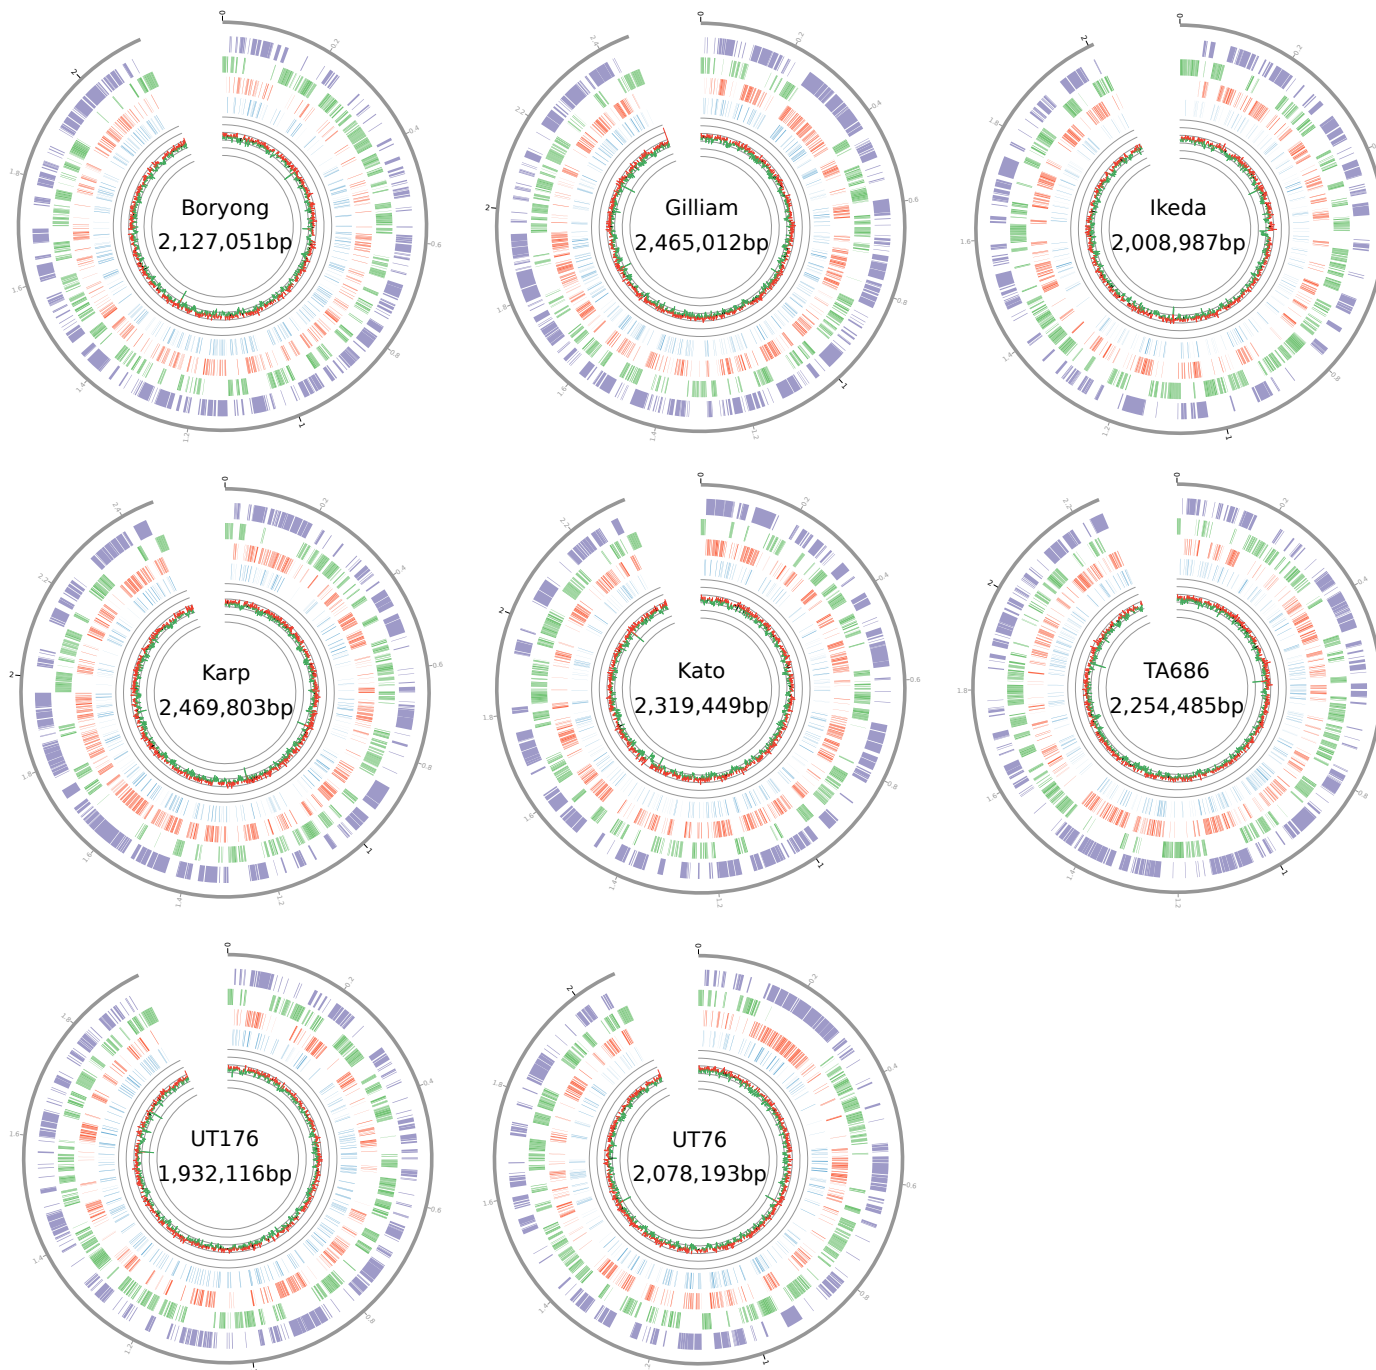

622

623 *Figure 1. Ring diagrams for all single-contig strains. From outermost feature in each*

624 *genome, moving inwards: repetitive regions are shown in purple, core genes in green, repeat*

625 *genes in red and pseudogenes in blue. The track shows the GC percentage in windows of*

626 *1000bp. Values above the median GC are in green, and values below the median GC are in*

627 *red.*

628

629



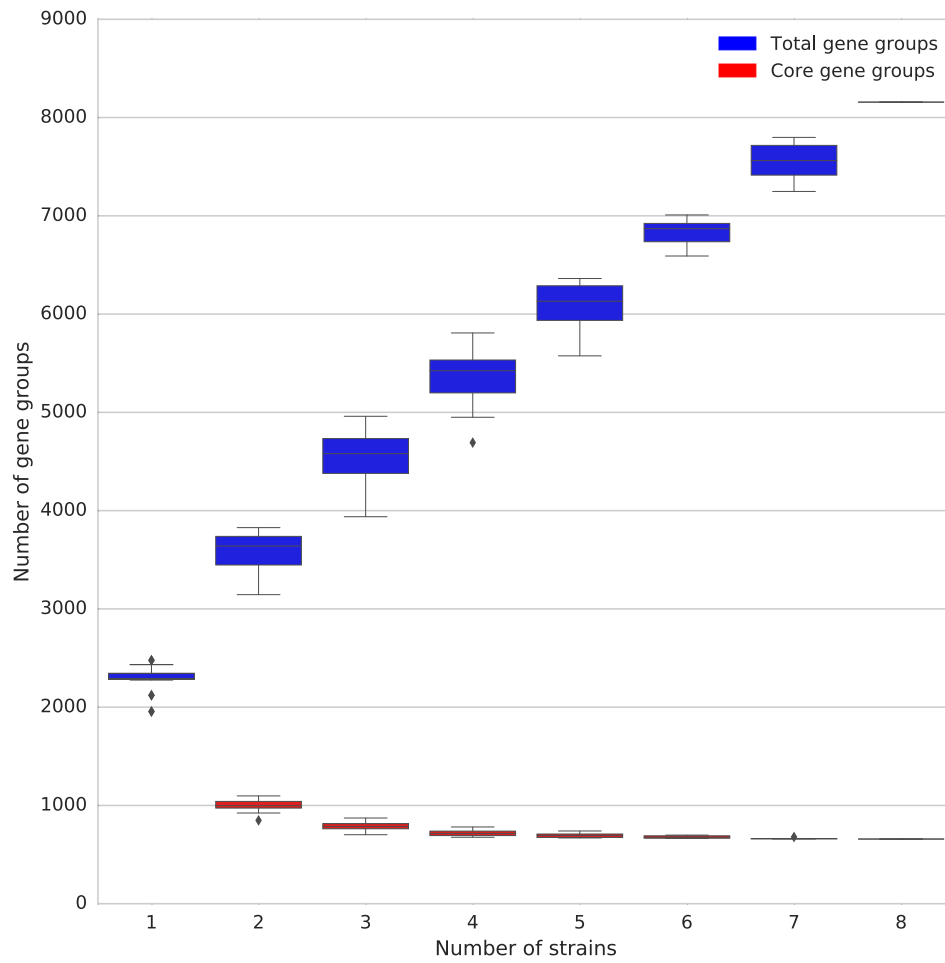

630

631 *Figure 2: The number of core gene groups and the total number of gene groups (including*  
632 *the core gene groups) as more strains are added to the analysis. Boxplots represent all*  
633 *possible combinations of the number of strains given on the x-axis.*

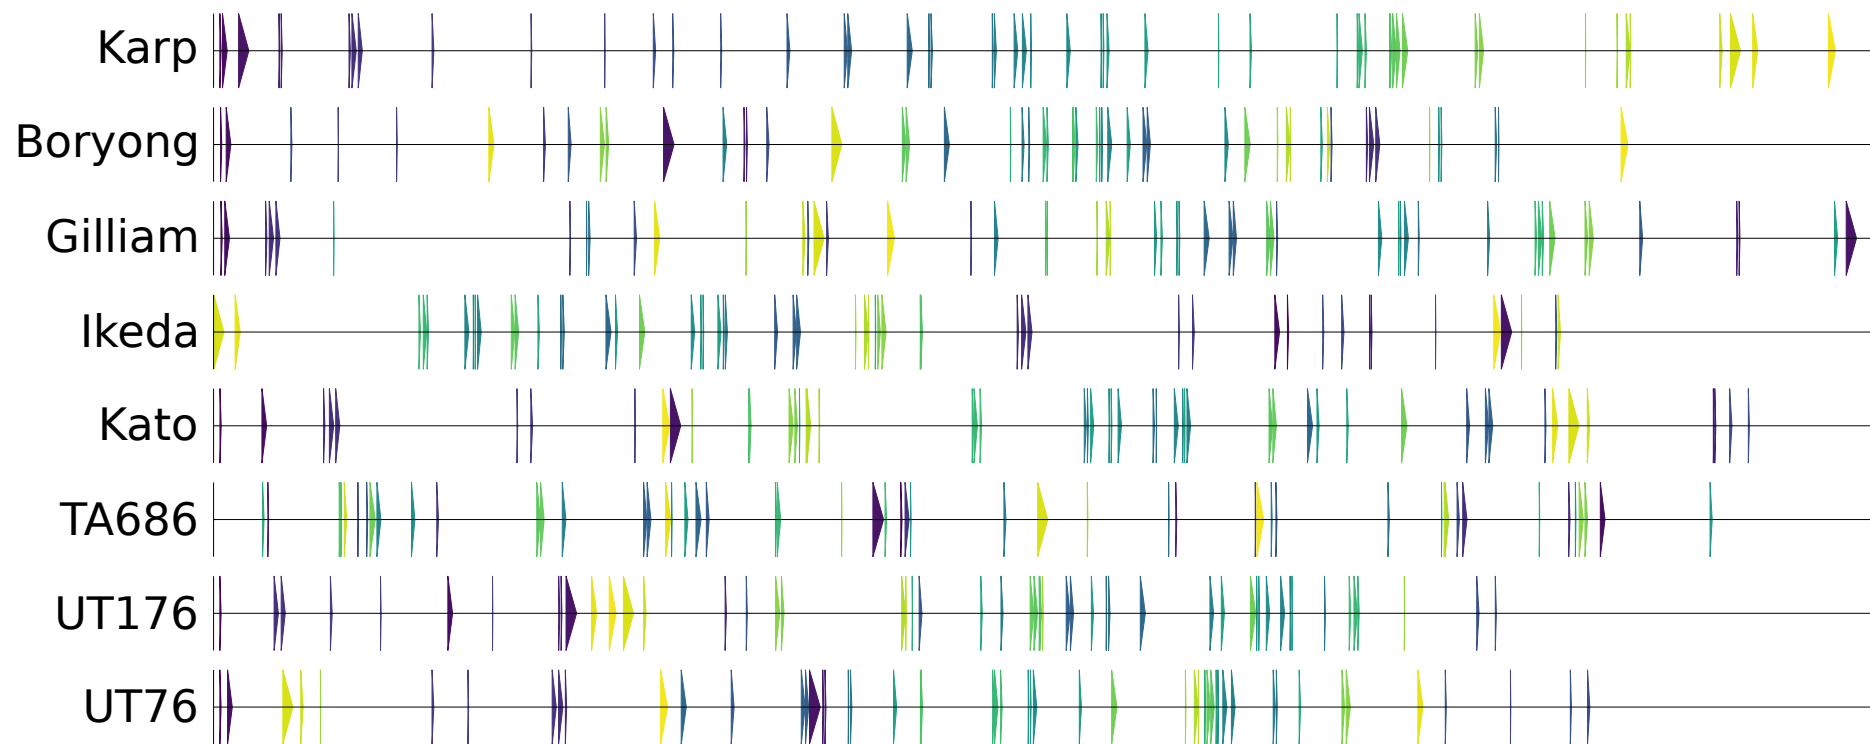

634

635

*Figure 3. Each arrow represents the location of a core gene island containing one or more core genes which are conserved in the same order*

636

*within an island across all strains. The arrows are coloured relative to their order in the Karp genome.*

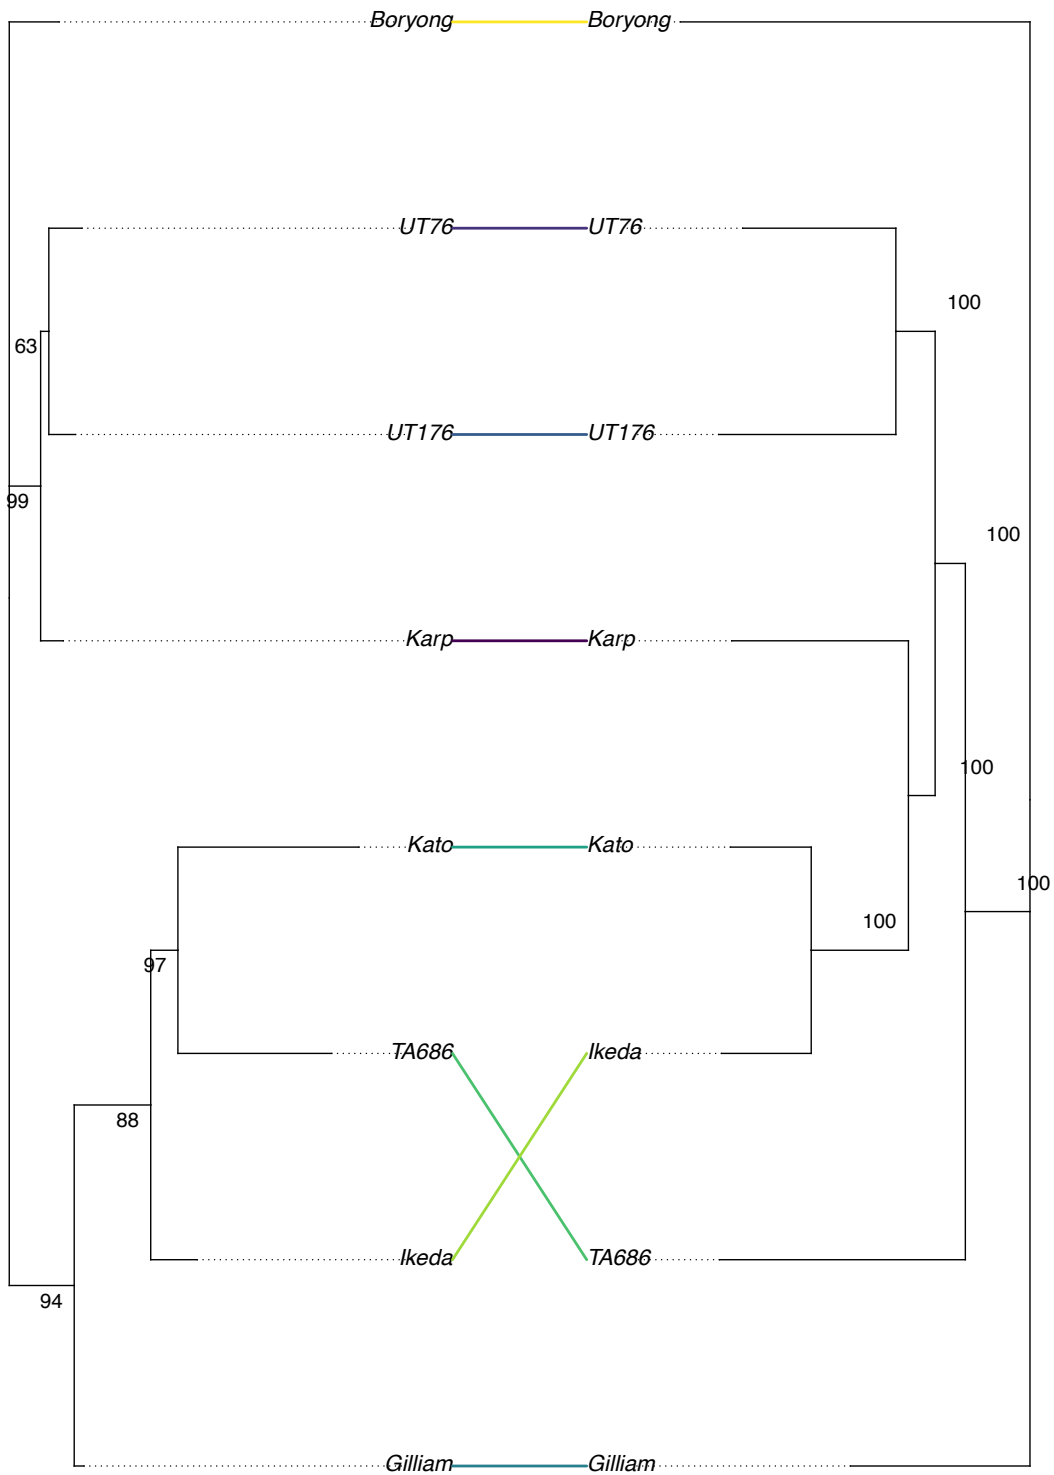

637

638 *Figure 4. Phylogenetic trees generated from the 56kDa antigen sequence (left) and the*  
639 *sequence of the 657 core genes (right). The tree was inferred using the maximum likelihood*  
640 *method implemented in RaxML, and bootstrap values were calculated with the RaxML rapid*  
641 *bootstrap method.*



| Strain  | Original Source                                         | Source in this study                  | Reference                 |
|---------|---------------------------------------------------------|---------------------------------------|---------------------------|
| Karp    | New Guinea, human patient, 1943                         | Naval Medical Research Centre (NMRC)  | (Enatsu et al., 1999)     |
| Kato    | Niigata, Japan, human patient, 1955                     | NMRC                                  | (Enatsu et al., 1999)     |
| Gilliam | Indian-Burmese border, human patient, 1943              | NMRC                                  | (Rights and Smadel, 1948) |
| TA686   | Thailand, animal ( <i>Tupaia glis</i> ), 1963           | NMRC                                  | (Enatsu et al., 1999)     |
| TA763   | Thailand, animal ( <i>Rattus rajah</i> ), 1963          | NMRC                                  | (Enatsu et al., 1999)     |
| FPW1038 | Thailand-Burmese border, human patient (pregnant), 2010 | Mahidol-Oxford Research Centre (MORU) | (McGready et al., 2010)   |
| UT76    | Udon Thani, Thailand, human patient, 2003               | MORU                                  | (Blacksell et al., 2008)  |
| UT176   | Udon Thani, Thailand, human patient, 2004               | MORU                                  | (Paris et al., 2009)      |

642 Table 1. Bacterial strains used in this study.

643

| Strain   | Genome length (bp) | Contigs | GC percentage | Errors corrected by Illumina sequencing |
|----------|--------------------|---------|---------------|-----------------------------------------|
| Boryong* | 2,127,051          | 1       | 31            | -                                       |
| Ikeda*   | 2,008,987          | 1       | 31            | -                                       |
| FPW1038  | 2,035,338          | 25      | 31            | 265                                     |
| Gilliam  | 2,465,012          | 1       | 31            | 7                                       |
| Karp     | 2,469,803          | 1       | 31            | 48                                      |
| Kato     | 2,319,449          | 1       | 31            | 5                                       |
| TA686    | 2,254,485          | 1       | 31            | 28                                      |
| TA763    | 2,089,396          | 8       | 31            | 88                                      |
| UT76     | 2,078,193          | 1       | 30            | 2                                       |
| UT176    | 1,932,116          | 1       | 30            | 13                                      |

644

645 Table 2. Assembly statistics for the 10 assemblies used in this analysis. Genomes marked  
646 with \* are previously-assembled reference strains.

647

648

| Strain  | Genes | Annotated as hypothetical |
|---------|-------|---------------------------|
| Boryong | 2443  | 547                       |
| Ikeda   | 2186  | 417                       |
| FPW1038 | 2198  | 369                       |
| Gilliam | 2709  | 463                       |
| Karp    | 2578  | 470                       |
| Kato    | 2406  | 465                       |
| TA686   | 2546  | 474                       |
| TA763   | 2212  | 396                       |
| UT76    | 2247  | 420                       |
| UT176   | 2086  | 325                       |

649

650 *Table 3. Number of genes predicted in each strain after annotation with Prokka, and the*  
651 *number of genes which were annotated as hypothetical. The Boryong and Ikeda strains were*  
652 *reannotated with Prokka for consistency between strains.*

653

654 **Supplementary Figures and Tables**

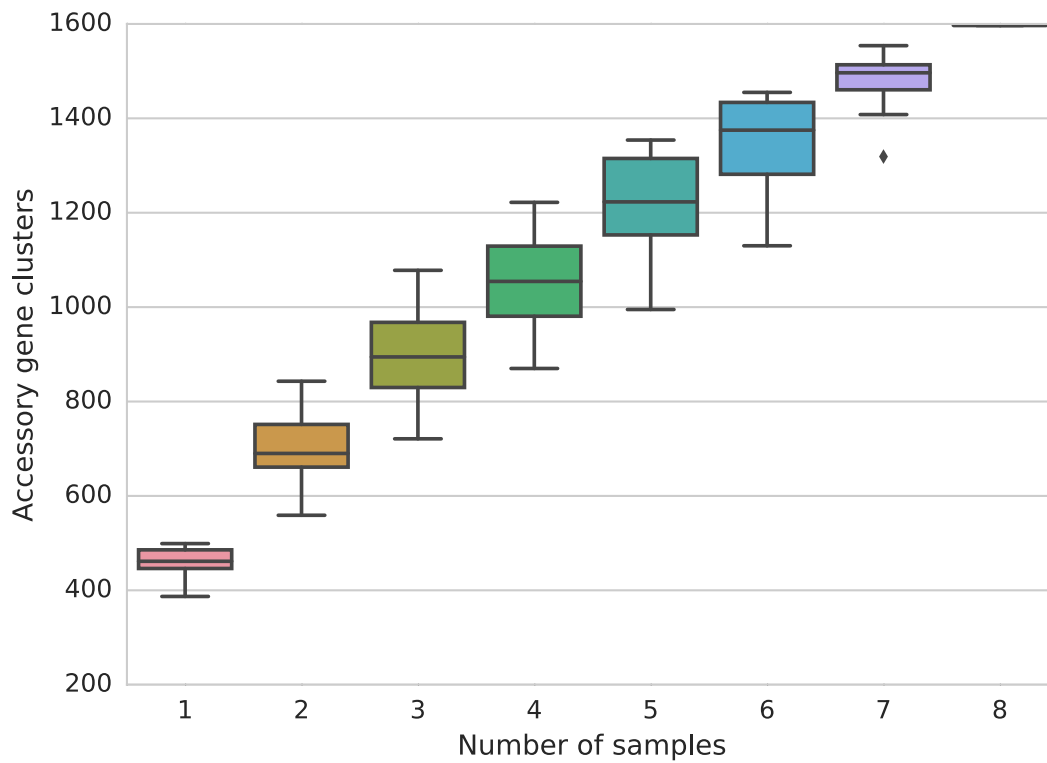

655

656 *Figure S1. Boxplot of accessory genes clustered with a lenient length threshold to show how*  
657 *the number of clusters increases with number of samples included in the analysis.*

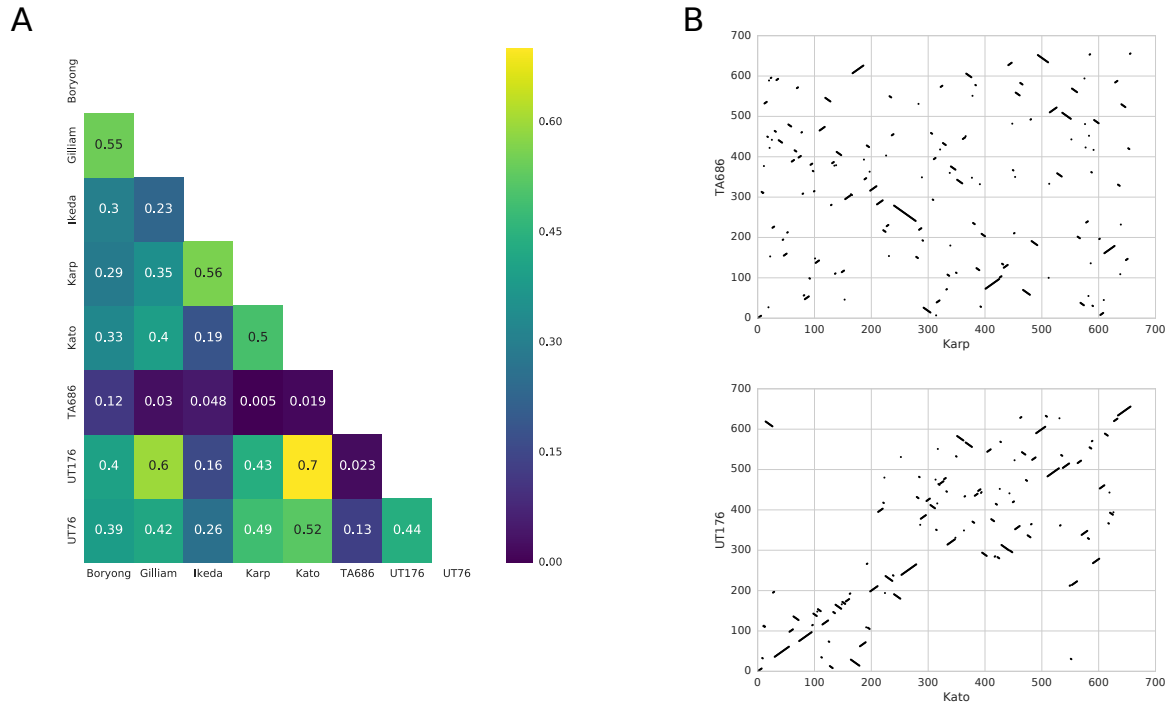

658

659

660 *Figure S2. A - Heatmap showing the correlation in gene order between each pair of samples.*

661 *B – dotplots showing the gene ordering between the pair with the highest correlation (Kato*

662 *and UT176) and the lowest correlation (Karp and TA686).*

663

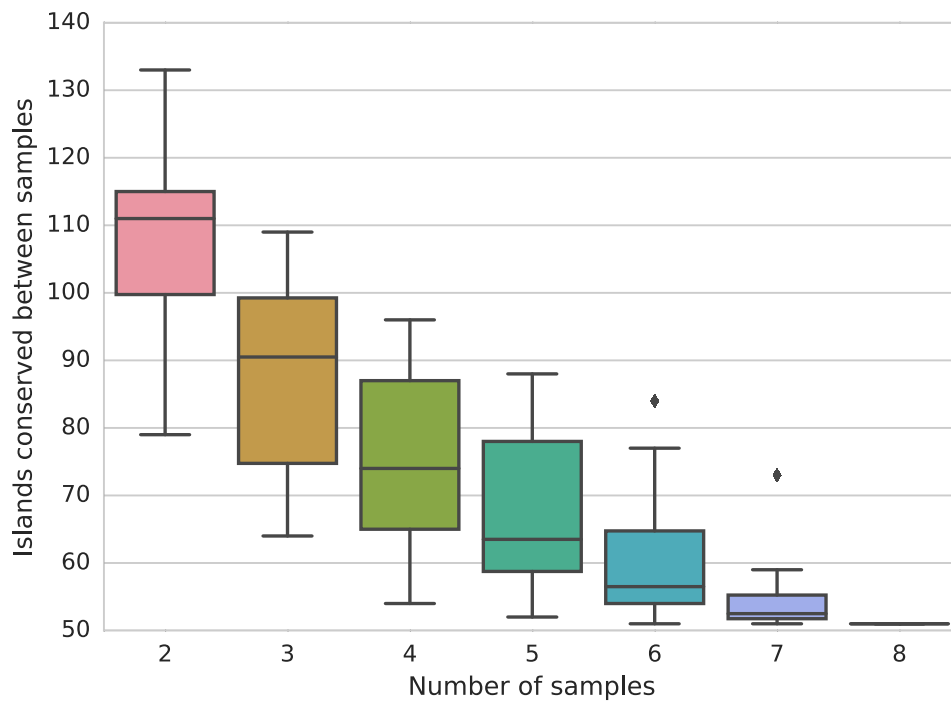

664

665

666 *Figure S3. Boxplot showing the number of islands conserved between samples across all*  
667 *different combinations of samples.*

668

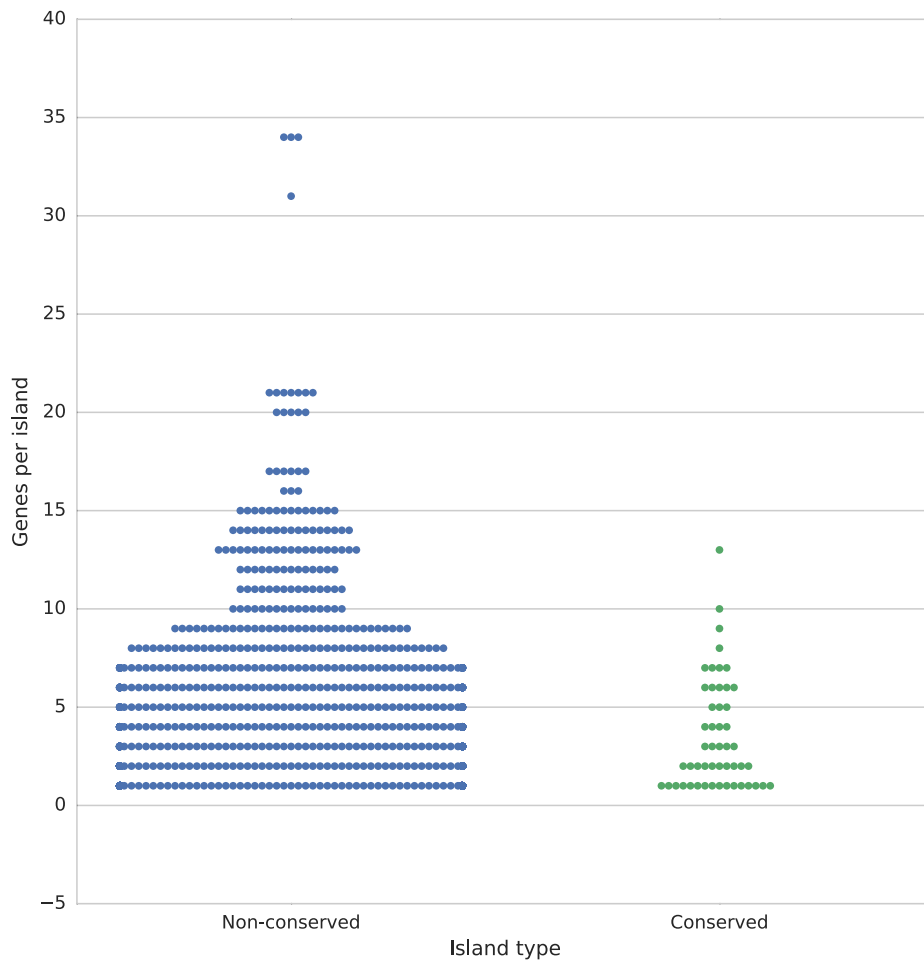

669

670 *Figure S4. The number of genes per island in conserved versus non-conserved islands.*

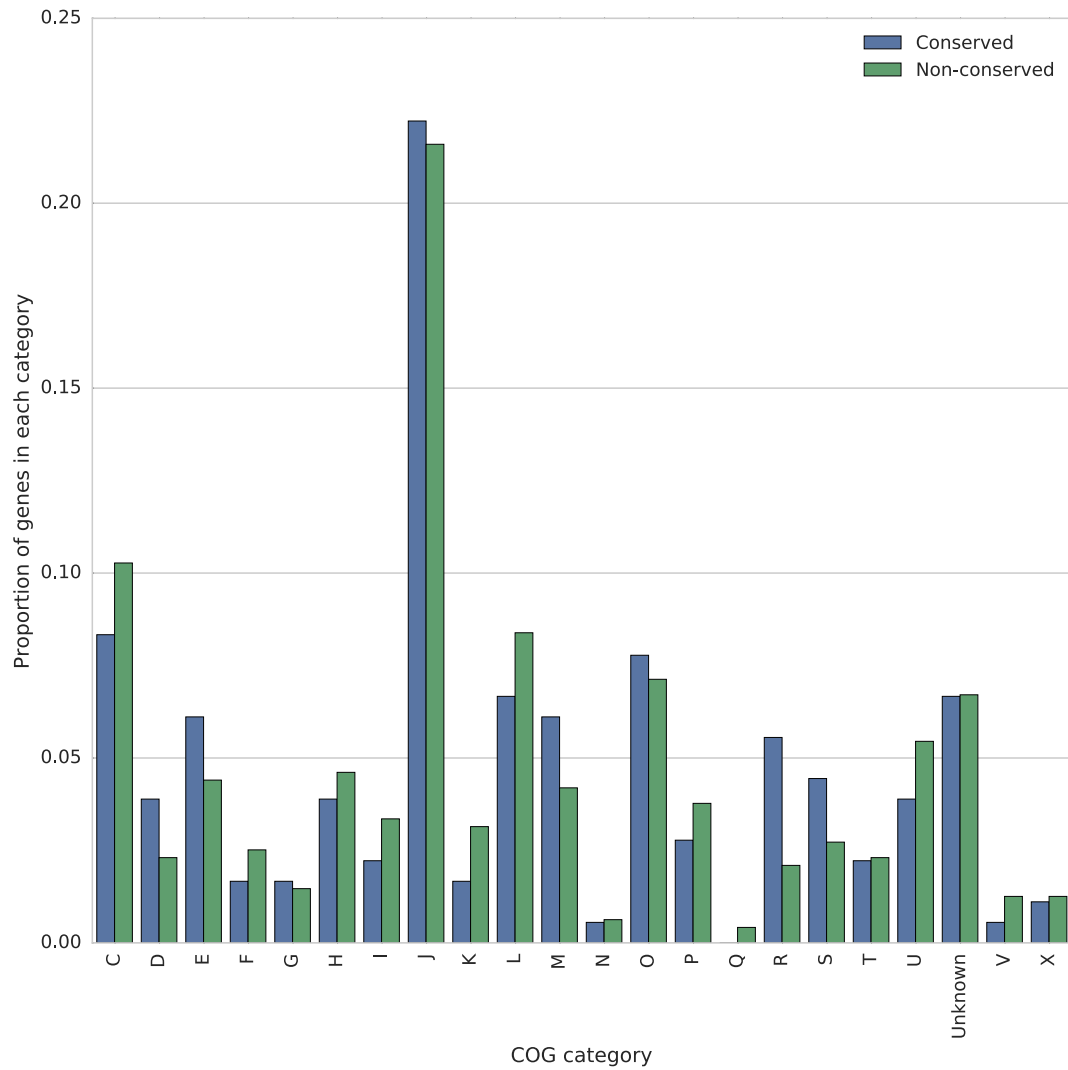

671

672 *Figure S5. The proportion of core genes which are in conserved and non-conserved islands in*  
673 *each COG category.*

674



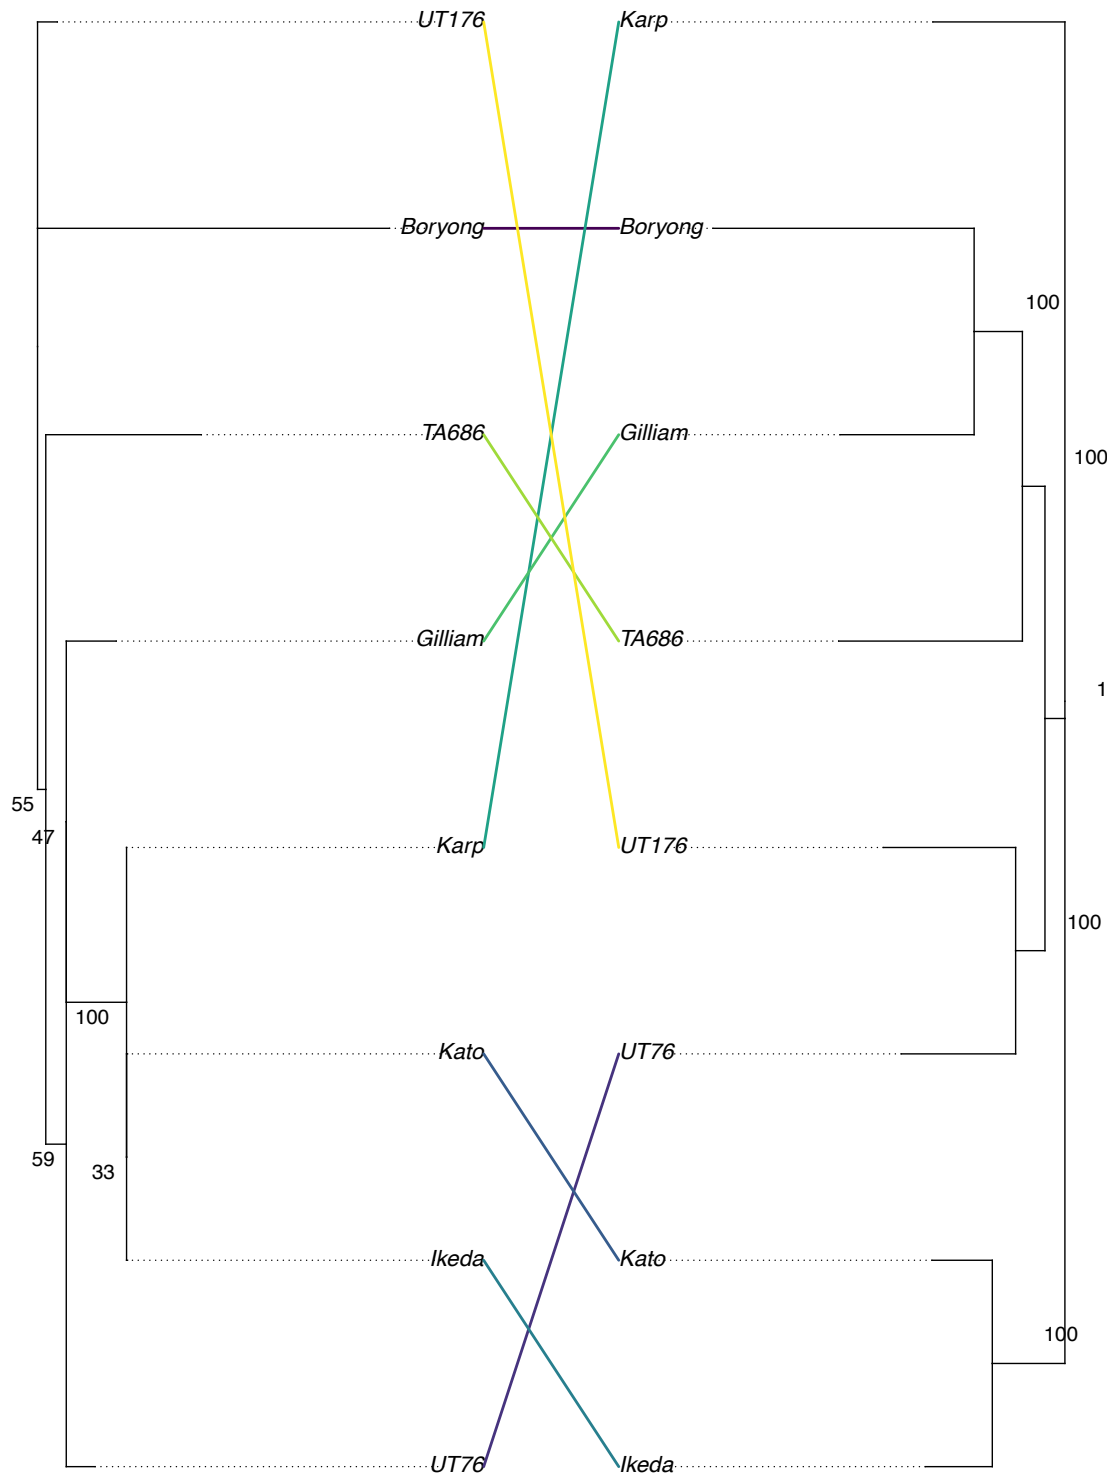

675

676 *Figure S6. A phylogenetic tree showing the relationship between a tree generated using the*  
677 *47kDa antigen sequences, and the sequences of 657 core genes.*

678

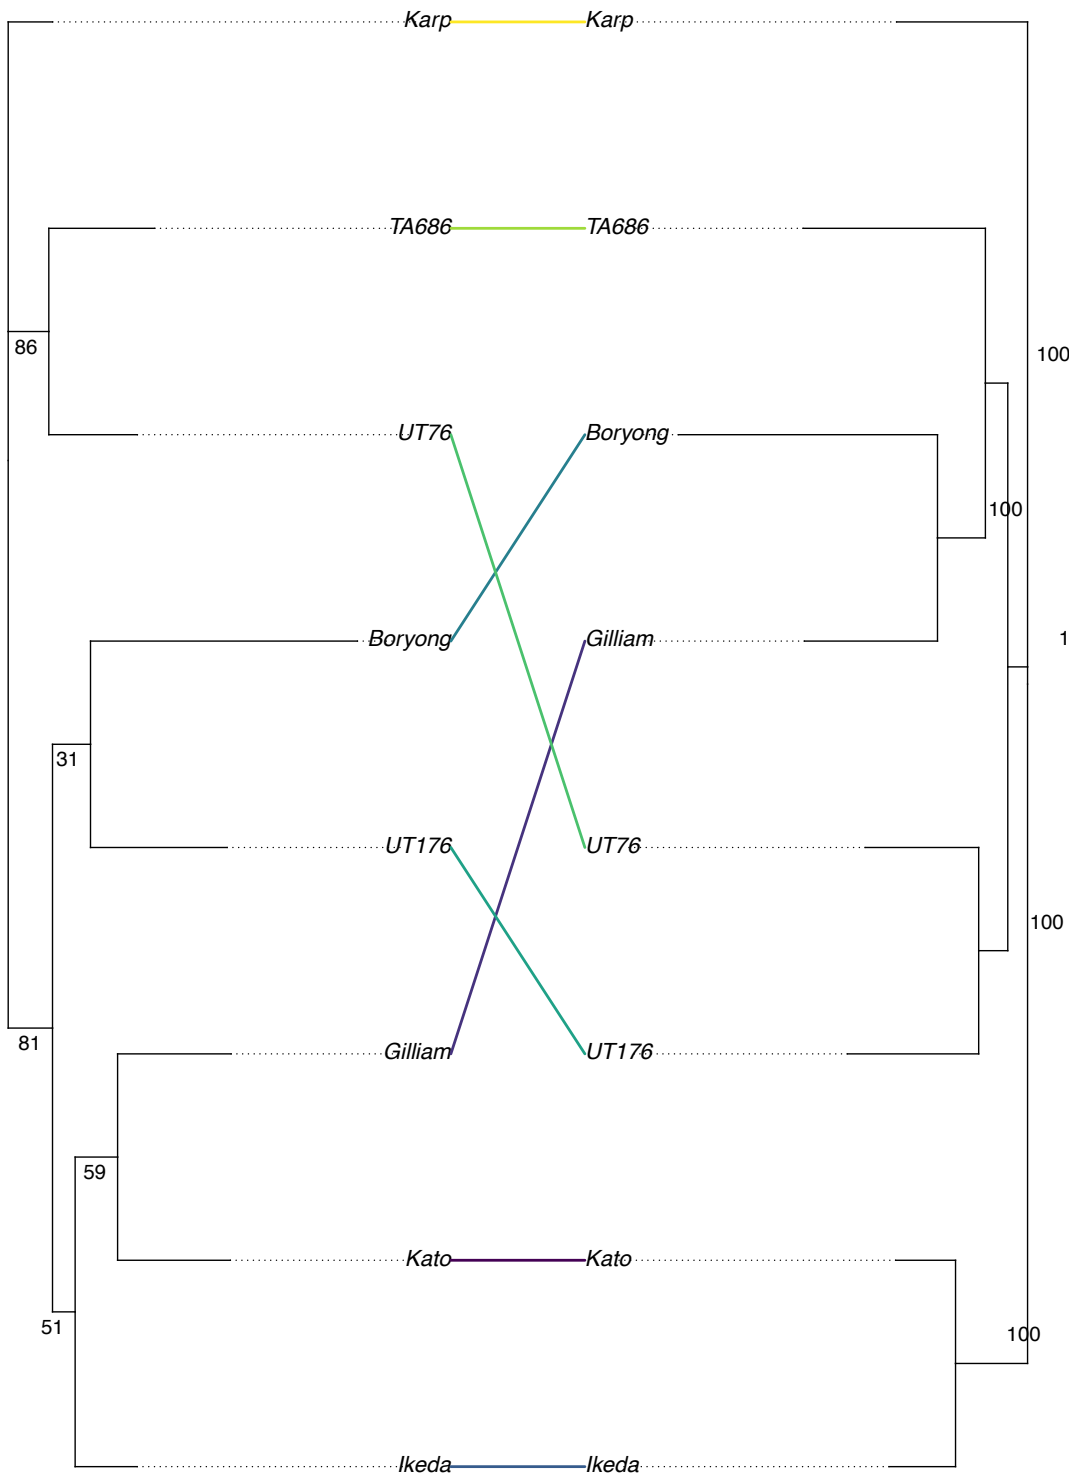

679

680 *Figure S7. A phylogenetic tree showing the relationship between a tree generated using*  
681 *MLST gene sequences, and the sequences of 657 core genes.*

682

| Strain  | Sequencing                    | Accession   |
|---------|-------------------------------|-------------|
| Karp    | Institute for Genome Sciences | PRJNA212440 |
| Kato    | Institute for Genome Sciences | PRJNA212441 |
| Gilliam | Institute for Genome Sciences | PRJNA212442 |
| TA686   | MicrobesNG                    | PRJEB24834  |
| TA763   | Institute for Genome Sciences | PRJNA212454 |
| FPW1038 | Oxford Genomics Centre        | PRJEB24834  |
| UT76    | Oxford Genomics Centre        | PRJEB24834  |
| UT176   | Oxford Genomics Centre        | PRJEB24834  |

683 *Table S1. Sources and data accession for Illumina sequencing data.*

684

| Genome                                                     | NCBI Identifier |
|------------------------------------------------------------|-----------------|
| <i>Orientia tsutsugamushi</i> strain Boryong               | GCF_000063545.1 |
| <i>Orientia tsutsugamushi</i> strain Ikeda                 | GCF_000010205.1 |
| <i>Rickettsia typhi</i> strain Wilmington                  | GCF_000008045.1 |
| <i>Rickettsia</i> endosymbiont of <i>Ixodes scapularis</i> | GCF_000160735.1 |

685 *Table S2. NCBI identifiers for previously published strains used in this paper.*

686

687  
688

| Sample     | Genome Length | Length of repetitive sequence (bp) | Percentage of genome which is repetitive |
|------------|---------------|------------------------------------|------------------------------------------|
| Boryong    | 2127051       | 895302                             | 42                                       |
| FPW1038    | 2035338       | 957348                             | 47                                       |
| Gilliam    | 2465012       | 1246424                            | 51                                       |
| Ikeda      | 2008987       | 721214                             | 36                                       |
| Karp       | 2469803       | 1210014                            | 49                                       |
| Kato       | 2319449       | 1050415                            | 45                                       |
| TA686      | 2254553       | 976333                             | 43                                       |
| TA763      | 2089396       | 895735                             | 43                                       |
| UT176      | 1932116       | 635697                             | 33                                       |
| UT76       | 2078193       | 868414                             | 42                                       |
| REIS       | 2100092       | 426115                             | 20                                       |
| Wilmington | 1111496       | 0                                  | 0                                        |

689 *Table S3. Total length of repetitive genome sequences in each strain, and as a percentage of*  
690 *the genome. REIS: Rickettsia endosymbiont of Ixodes scapularis. Wilmington: Rickettsia*  
691 *typhi strain Wilmington.*

| Sample  | Genome Length | Length of core genes | Core genes as proportion of genome | Length of repeat genes | Repeat genes as percentage of genome |
|---------|---------------|----------------------|------------------------------------|------------------------|--------------------------------------|
| Boryong | 2127051       | 679631               | 0.32                               | 748541                 | 35                                   |
| Gilliam | 2465012       | 681491               | 0.28                               | 1165831                | 47                                   |
| Ikeda   | 2008987       | 683889               | 0.34                               | 757868                 | 38                                   |
| Karp    | 2469803       | 682061               | 0.28                               | 1163785                | 47                                   |
| Kato    | 2319449       | 682142               | 0.29                               | 1039243                | 45                                   |
| TA686   | 2254553       | 682706               | 0.30                               | 933469                 | 41                                   |
| UT176   | 1932116       | 681689               | 0.35                               | 738572                 | 38                                   |
| UT76    | 2078193       | 682964               | 0.33                               | 826716                 | 40                                   |

692

693 *Table S4. Core gene and core repeat statistics.*

694

695

696

697

698

699

700

701

702

703

704

705

706

707

708

709 *Table S5. Core genes calculated by Roary. Gene names are given for the Karp strain.*

| Gene group | Island number | Annotation                                                                              | Gene name | Boryong           | Gilliam           | Ikeda           | Karp       | Kato       | TA686           | UT176           | UT76-HP       |
|------------|---------------|-----------------------------------------------------------------------------------------|-----------|-------------------|-------------------|-----------------|------------|------------|-----------------|-----------------|---------------|
| clpP       | 1             | ATP-dependent Clp protease proteolytic subunit                                          |           | Boryong_01<br>567 | Gilliam_019<br>42 | Ikeda_0042<br>3 | Karp_01574 | Kato_01535 | TA686_0207<br>9 | UT176_017<br>55 | UT76-HP_01648 |
| gatB       | 2             | aspartyl/glutamyl-tRNA(Asn/Gln) amidotransferase subunit B                              | GatB      | Boryong_01<br>584 | Gilliam_019<br>57 | Ikeda_0040<br>9 | Karp_01279 | Kato_01521 | TA686_0028<br>8 | UT176_017<br>41 | UT76-HP_01661 |
| gatA       | 2             | glutamyl-tRNA(Gln) amidotransferase subunit A                                           | GatA      | Boryong_01<br>583 | Gilliam_019<br>56 | Ikeda_0041<br>0 | Karp_01280 | Kato_01522 | TA686_0028<br>9 | UT176_017<br>42 | UT76-HP_01660 |
| group_5707 | 2             | aspartyl/glutamyl-tRNA(Asn/Gln) amidotransferase subunit C                              | GatC      | Boryong_01<br>582 | Gilliam_019<br>55 | Ikeda_0041<br>1 | Karp_01281 | Kato_01523 | TA686_0029<br>0 | UT176_017<br>43 | UT76-HP_01659 |
| group_6080 | 2             | RNase J family beta-CASP ribonuclease                                                   |           | Boryong_01<br>581 | Gilliam_019<br>54 | Ikeda_0041<br>2 | Karp_01282 | Kato_01524 | TA686_0029<br>1 | UT176_017<br>44 | UT76-HP_01658 |
| group_7975 | 2             | DNA-binding response regulator                                                          |           | Boryong_01<br>580 | Gilliam_019<br>53 | Ikeda_0041<br>3 | Karp_01283 | Kato_01525 | TA686_0029<br>2 | UT176_017<br>45 | UT76-HP_01657 |
| group_250  | 3             | transposase                                                                             |           | Boryong_00<br>790 | Gilliam_027<br>03 | Ikeda_0211<br>8 | Karp_00040 | Kato_00709 | TA686_0116<br>2 | UT176_005<br>74 | UT76-HP_00998 |
| group_5845 | 3             | multidrug ABC transporter ATP-binding protein                                           |           | Boryong_00<br>791 | Gilliam_027<br>04 | Ikeda_0211<br>9 | Karp_00041 | Kato_00710 | TA686_0116<br>1 | UT176_005<br>73 | UT76-HP_00999 |
| group_7831 | 3             | UMP kinase                                                                              |           | Boryong_00<br>792 | Gilliam_027<br>05 | Ikeda_0212<br>0 | Karp_00042 | Kato_00711 | TA686_0116<br>0 | UT176_005<br>72 | UT76-HP_01000 |
| group_5846 | 3             | phospho-N-acetylmuramoyl-pentapeptide- transferase                                      | MraY      | Boryong_00<br>793 | Gilliam_027<br>06 | Ikeda_0212<br>1 | Karp_00043 | Kato_00712 | TA686_0115<br>9 | UT176_005<br>71 | UT76-HP_01001 |
| group_5550 | 3             | UDP-N-acetylmuramoylalanyl-D-glutamyl-2, 6-diaminopimelate--3 D-alanyl-D-alanine ligase | MurF      | Boryong_00<br>794 | Gilliam_027<br>07 | Ikeda_0212<br>2 | Karp_00044 | Kato_00713 | TA686_0115<br>8 | UT176_005<br>70 | UT76-HP_01002 |
| group_5397 | 3             | UDP-N-acetylmuramoyl-L-alanyl-D-glutamate--2, 6-diaminopimelate ligase                  | MurE      | Boryong_00<br>795 | Gilliam_027<br>08 | Ikeda_0212<br>3 | Karp_00045 | Kato_00714 | TA686_0115<br>7 | UT176_005<br>69 | UT76-HP_01003 |
| group_5847 | 3             | penicillin-binding protein                                                              | PBP       | Boryong_00<br>796 | Gilliam_027<br>09 | Ikeda_0212<br>4 | Karp_00046 | Kato_00715 | TA686_0115<br>6 | UT176_005<br>68 | UT76-HP_01004 |
| ftsL       | 3             | hypothetical protein                                                                    | FtsL      | Boryong_00<br>797 | Gilliam_027<br>10 | Ikeda_0212<br>5 | Karp_00047 | Kato_00716 | TA686_0115<br>5 | UT176_005<br>67 | UT76-HP_01005 |
| group_5670 | 3             | 16S rRNA methyltransferase                                                              |           | Boryong_00<br>798 | Gilliam_027<br>11 | Ikeda_0212<br>6 | Karp_00048 | Kato_00717 | TA686_0115<br>4 | UT176_005<br>66 | UT76-HP_01006 |
| group_6027 | 3             | molecular chaperone DnaJ                                                                | DnaJ      | Boryong_00<br>799 | Gilliam_027<br>12 | Ikeda_0212<br>7 | Karp_00049 | Kato_00718 | TA686_0115<br>3 | UT176_005<br>65 | UT76-HP_01007 |
| group_7111 | 3             | molecular chaperone DnaK                                                                | DnaK      | Boryong_00<br>800 | Gilliam_027<br>13 | Ikeda_0212<br>8 | Karp_00050 | Kato_00719 | TA686_0115<br>2 | UT176_005<br>64 | UT76-HP_01008 |
| group_6028 | 3             | BolA family transcriptional regulator                                                   |           | Boryong_00<br>801 | Gilliam_027<br>14 | Ikeda_0212<br>9 | Karp_00051 | Kato_00720 | TA686_0115<br>1 | UT176_005<br>63 | UT76-HP_01009 |
| group_5671 | 3             | enoyl-ACP reductase                                                                     | ENR       | Boryong_00<br>802 | Gilliam_027<br>15 | Ikeda_0213<br>0 | Karp_00052 | Kato_00721 | TA686_0115<br>0 | UT176_005<br>62 | UT76-HP_01010 |
| group_4752 | 4             | sodium:proline symporter                                                                |           | Boryong_00<br>980 | Gilliam_006<br>83 | Ikeda_0186<br>3 | Karp_00697 | Kato_02375 | TA686_0210<br>2 | UT176_020<br>68 | UT76-HP_02241 |
| group_5324 | 5             | hypothetical protein                                                                    |           | Boryong_00<br>010 | Gilliam_000<br>14 | Ikeda_0177<br>8 | Karp_00009 | Kato_00009 | TA686_0119<br>8 | UT176_000<br>09 | UT76-HP_00009 |
| group_5345 | 6             | hypothetical protein                                                                    |           | Boryong_00<br>676 | Gilliam_022<br>58 | Ikeda_0108<br>4 | Karp_02002 | Kato_00906 | TA686_0234<br>1 | UT176_009<br>40 | UT76-HP_01866 |
| group_5664 | 6             | UDP-N-acetylmuramate--L-alanine ligase                                                  | MurC      | Boryong_00<br>675 | Gilliam_022<br>59 | Ikeda_0108<br>5 | Karp_02003 | Kato_00905 | TA686_0234<br>0 | UT176_009<br>39 | UT76-HP_01867 |
| group_5663 | 6             | UDP-N-acetylenolpyruvoylglucosamine reductase                                           | MurB      | Boryong_00<br>674 | Gilliam_022<br>60 | Ikeda_0108<br>6 | Karp_02004 | Kato_00904 | TA686_0233<br>9 | UT176_009<br>38 | UT76-HP_01868 |
| group_5839 | 6             | D-alanine--D-alanine ligase                                                             | Ddl       | Boryong_00<br>673 | Gilliam_022<br>61 | Ikeda_0108<br>7 | Karp_02005 | Kato_00903 | TA686_0233<br>8 | UT176_009<br>37 | UT76-HP_01869 |
| group_5662 | 6             | cell division protein FtsQ                                                              | FtsQ      | Boryong_00<br>672 | Gilliam_022<br>62 | Ikeda_0108<br>8 | Karp_02006 | Kato_00902 | TA686_0233<br>7 | UT176_009<br>36 | UT76-HP_01870 |
| group_5548 | 6             | DNA replication/repair protein RecF                                                     | RecF      | Boryong_00<br>671 | Gilliam_022<br>63 | Ikeda_0108<br>9 | Karp_02007 | Kato_00901 | TA686_0233<br>6 | UT176_009<br>35 | UT76-HP_01871 |
| group_5349 | 7             | hypothetical protein                                                                    |           | Boryong_01<br>099 | Gilliam_009<br>69 | Ikeda_0000<br>1 | Karp_02387 | Kato_02127 | TA686_0141<br>9 | UT176_006<br>68 | UT76-HP_00144 |
| group_6051 | 7             | virB4 protein precursor                                                                 |           | Boryong_01<br>098 | Gilliam_009<br>70 | Ikeda_0000<br>2 | Karp_02388 | Kato_02126 | TA686_0141<br>8 | UT176_006<br>67 | UT76-HP_00143 |
| group_5858 | 7             | type I glyceraldehyde-3-phosphate dehydrogenase                                         | GapA      | Boryong_01<br>097 | Gilliam_009<br>71 | Ikeda_0000<br>3 | Karp_02389 | Kato_02125 | TA686_0141<br>7 | UT176_006<br>66 | UT76-HP_00142 |
| group_5857 | 7             | phosphoglycerate kinase                                                                 | Pgk       | Boryong_01<br>096 | Gilliam_009<br>72 | Ikeda_0000<br>4 | Karp_02390 | Kato_02124 | TA686_0141<br>6 | UT176_006<br>65 | UT76-HP_00141 |
| group_6050 | 7             | hypothetical protein                                                                    |           | Boryong_01<br>095 | Gilliam_009<br>73 | Ikeda_0000<br>5 | Karp_02391 | Kato_02123 | TA686_0141<br>5 | UT176_006<br>64 | UT76-HP_00140 |
| group_5856 | 7             | proline--tRNA ligase                                                                    | ProS      | Boryong_01<br>094 | Gilliam_009<br>74 | Ikeda_0000<br>6 | Karp_02392 | Kato_02122 | TA686_0141<br>4 | UT176_006<br>63 | UT76-HP_00139 |

|            |                                                                                                        |       |                   |                   |                 |                          |   |                  |                 |                   |
|------------|--------------------------------------------------------------------------------------------------------|-------|-------------------|-------------------|-----------------|--------------------------|---|------------------|-----------------|-------------------|
| group_7234 | 7 ATP-dependent Clp protease ATP-binding subunit ClpX                                                  | ClpX  | Boryong_01<br>093 | Gilliam_009<br>75 | Ikeda_0000<br>7 | Karp_02393<br>Kato_02121 | 3 | TA686_0141<br>62 | UT176_006<br>62 | UT76-<br>HP_00138 |
| group_8077 | 7 elongation factor P                                                                                  |       | Boryong_01<br>092 | Gilliam_009<br>76 | Ikeda_0000<br>8 | Karp_02394<br>Kato_02120 | 2 | TA686_0141<br>61 | UT176_006<br>61 | UT76-<br>HP_00137 |
| group_6049 | 7 extragenic suppressor protein SuhB                                                                   | SuhB  | Boryong_01<br>091 | Gilliam_009<br>77 | Ikeda_0000<br>9 | Karp_02395<br>Kato_02119 | 1 | TA686_0141<br>60 | UT176_006<br>60 | UT76-<br>HP_00136 |
| group_5557 | tRNA (adenosine(37)-N6)-threonylcarbamoyltransferase complex<br>7 dimerization subunit type 1 TsaB     | TsaB  | Boryong_01<br>090 | Gilliam_009<br>78 | Ikeda_0001<br>0 | Karp_02396<br>Kato_02118 | 0 | TA686_0141<br>59 | UT176_006<br>59 | UT76-<br>HP_00135 |
| group_5351 | 8 hypothetical protein                                                                                 |       | Boryong_01<br>511 | Gilliam_013<br>39 | Ikeda_0114<br>3 | Karp_01848<br>Kato_00841 | 1 | TA686_0023<br>64 | UT176_013<br>64 | UT76-<br>HP_01169 |
| group_5352 | 9 glycerol-3-phosphate dehydrogenase (NAD(P)( ))                                                       | GpsA  | Boryong_01<br>513 | Gilliam_013<br>37 | Ikeda_0114<br>5 | Karp_01850<br>Kato_00843 | 9 | TA686_0022<br>66 | UT176_013<br>66 | UT76-<br>HP_01171 |
| group_8119 | tRNA (N(6)-L-threonylcarbamoyladenosine(37)-C(2))-<br>9 methylthiotransferase MtaB                     | MtaB  | Boryong_01<br>514 | Gilliam_013<br>36 | Ikeda_0114<br>6 | Karp_01851<br>Kato_00844 | 8 | TA686_0022<br>67 | UT176_013<br>67 | UT76-<br>HP_01172 |
| group_5359 | 10 crossover junction endonuclease RuvC                                                                | RuvC  | Boryong_01<br>866 | Gilliam_014<br>37 | Ikeda_0105<br>3 | Karp_02233<br>Kato_00938 | 2 | TA686_0209<br>31 | UT176_011<br>31 | UT76-<br>HP_01610 |
| group_5717 | 10 tRNA dihydrouridine synthase DusB                                                                   | DusB  | Boryong_01<br>867 | Gilliam_014<br>38 | Ikeda_0105<br>4 | Karp_02234<br>Kato_00937 | 1 | TA686_0209<br>32 | UT176_011<br>32 | UT76-<br>HP_01611 |
| group_5494 | 10 hypothetical protein                                                                                |       | Boryong_01<br>868 | Gilliam_014<br>39 | Ikeda_0105<br>5 | Karp_02235<br>Kato_00936 | 0 | TA686_0209<br>33 | UT176_011<br>33 | UT76-<br>HP_01612 |
| group_5495 | bifunctional 3-demethylubiquinone 3-O-methyltransferase/2-<br>10 octaprenyl-6-hydroxy phenol methylase |       | Boryong_01<br>869 | Gilliam_014<br>40 | Ikeda_0105<br>6 | Karp_02236<br>Kato_00935 | 9 | TA686_0208<br>34 | UT176_011<br>34 | UT76-<br>HP_01613 |
| group_5718 | 10 protein-(glutamine-N5) methyltransferase, release factor-specific                                   |       | Boryong_01<br>870 | Gilliam_014<br>41 | Ikeda_0105<br>7 | Karp_02237<br>Kato_00934 | 8 | TA686_0208<br>35 | UT176_011<br>35 | UT76-<br>HP_01614 |
| group_6104 | 10 tRNA pseudouridine(38-40) synthase TruA                                                             | TruA  | Boryong_01<br>871 | Gilliam_014<br>42 | Ikeda_0105<br>8 | Karp_02238<br>Kato_00933 | 7 | TA686_0208<br>36 | UT176_011<br>36 | UT76-<br>HP_01615 |
| group_7746 | 10 50S ribosomal protein L13                                                                           | L13   | Boryong_01<br>872 | Gilliam_014<br>43 | Ikeda_0105<br>9 | Karp_02239<br>Kato_00932 | 6 | TA686_0208<br>37 | UT176_011<br>37 | UT76-<br>HP_01616 |
| group_5719 | 10 30S ribosomal protein S9                                                                            | S9    | Boryong_01<br>873 | Gilliam_014<br>44 | Ikeda_0106<br>0 | Karp_02240<br>Kato_00931 | 5 | TA686_0208<br>38 | UT176_011<br>38 | UT76-<br>HP_01617 |
| group_5458 | 11 rRNA (cytidine-2'-O)-methyltransferase                                                              |       | Boryong_01<br>202 | Gilliam_017<br>33 | Ikeda_0048<br>2 | Karp_01858<br>Kato_01661 | 5 | TA686_0054<br>57 | UT176_013<br>57 | UT76-<br>HP_01640 |
| group_5865 | 11 serine-tRNA ligase                                                                                  | SerS  | Boryong_01<br>203 | Gilliam_017<br>34 | Ikeda_0048<br>1 | Karp_01859<br>Kato_01662 | 6 | TA686_0054<br>56 | UT176_013<br>56 | UT76-<br>HP_01639 |
| group_7705 | 11 twin-arginine translocase subunit TatC                                                              | TatC  | Boryong_01<br>204 | Gilliam_017<br>35 | Ikeda_0048<br>0 | Karp_01860<br>Kato_01663 | 7 | TA686_0054<br>55 | UT176_013<br>55 | UT76-<br>HP_01638 |
| group_6566 | 11 hypothetical protein                                                                                |       | Boryong_01<br>205 | Gilliam_017<br>36 | Ikeda_0047<br>9 | Karp_01861<br>Kato_01664 | 8 | TA686_0054<br>54 | UT176_013<br>54 | UT76-<br>HP_01637 |
| group_6058 | 11 16S rRNA methyltransferase                                                                          |       | Boryong_01<br>206 | Gilliam_017<br>37 | Ikeda_0047<br>8 | Karp_01862<br>Kato_01665 | 9 | TA686_0054<br>53 | UT176_013<br>53 | UT76-<br>HP_01636 |
| group_7851 | 11 chromosome partitioning protein ParA                                                                | ParA  | Boryong_01<br>207 | Gilliam_017<br>38 | Ikeda_0047<br>7 | Karp_01863<br>Kato_01666 | 0 | TA686_0055<br>52 | UT176_013<br>52 | UT76-<br>HP_01635 |
| group_6059 | 11 chromosome partitioning protein                                                                     | ParB  | Boryong_01<br>208 | Gilliam_017<br>39 | Ikeda_0047<br>6 | Karp_01864<br>Kato_01667 | 1 | TA686_0055<br>51 | UT176_013<br>51 | UT76-<br>HP_01634 |
| group_5485 | 12 rod shape-determining protein MreC                                                                  | MreC  | Boryong_01<br>561 | Gilliam_021<br>76 | Ikeda_0033<br>6 | Karp_01810<br>Kato_01222 | 9 | TA686_0116<br>39 | UT176_018<br>39 | UT76-<br>HP_01300 |
| group_7287 | 12 rod shape-determining protein                                                                       | MreB  | Boryong_01<br>562 | Gilliam_021<br>75 | Ikeda_0033<br>5 | Karp_01811<br>Kato_01223 | 8 | TA686_0116<br>38 | UT176_018<br>38 | UT76-<br>HP_01301 |
| group_5575 | 12 dihydrolipoamide acetyltransferase                                                                  |       | Boryong_01<br>563 | Gilliam_021<br>74 | Ikeda_0033<br>4 | Karp_01812<br>Kato_01224 | 7 | TA686_0116<br>37 | UT176_018<br>37 | UT76-<br>HP_01302 |
| group_5491 | 13 aspartate kinase                                                                                    | AK    | Boryong_01<br>771 | Gilliam_019<br>06 | Ikeda_0077<br>2 | Karp_01348<br>Kato_01421 | 5 | TA686_0034<br>25 | UT176_017<br>25 | UT76-<br>HP_01353 |
| group_5712 | 13 hypothetical protein                                                                                |       | Boryong_01<br>772 | Gilliam_019<br>05 | Ikeda_0077<br>3 | Karp_01349<br>Kato_01420 | 6 | TA686_0034<br>24 | UT176_017<br>24 | UT76-<br>HP_01354 |
| group_8049 | 13 potassium transporter                                                                               |       | Boryong_01<br>773 | Gilliam_019<br>04 | Ikeda_0077<br>4 | Karp_01350<br>Kato_01419 | 7 | TA686_0034<br>23 | UT176_017<br>23 | UT76-<br>HP_01355 |
| group_5713 | 13 5-formyltetrahydrofolate cyclo-ligase                                                               | YgfA  | Boryong_01<br>774 | Gilliam_019<br>03 | Ikeda_0077<br>5 | Karp_01351<br>Kato_01418 | 8 | TA686_0034<br>22 | UT176_017<br>22 | UT76-<br>HP_01356 |
| group_5579 | 13 hypothetical protein                                                                                |       | Boryong_01<br>775 | Gilliam_019<br>02 | Ikeda_0077<br>6 | Karp_01352<br>Kato_01417 | 9 | TA686_0034<br>21 | UT176_017<br>21 | UT76-<br>HP_01357 |
| group_5496 | 14 ankyrin repeat-containing protein 13                                                                | Ank13 | Boryong_01<br>925 | Gilliam_015<br>41 | Ikeda_0052<br>3 | Karp_01630<br>Kato_01772 | 5 | TA686_0009<br>72 | UT176_012<br>72 | UT76-<br>HP_01784 |
| group_5411 | 14 hypothetical protein                                                                                |       | Boryong_01<br>926 | Gilliam_015<br>42 | Ikeda_0052<br>2 | Karp_01631<br>Kato_01773 | 4 | TA686_0009<br>73 | UT176_012<br>73 | UT76-<br>HP_01785 |
| group_5497 | 15 heme A synthase                                                                                     |       | Boryong_02<br>136 | Gilliam_015<br>73 | Ikeda_0078<br>7 | Karp_01402<br>Kato_01407 | 3 | TA686_0121<br>11 | UT176_017<br>11 | UT76-<br>HP_01347 |

|            |                                                                       |       |                   |                   |                 |                          |                 |                 |                   |
|------------|-----------------------------------------------------------------------|-------|-------------------|-------------------|-----------------|--------------------------|-----------------|-----------------|-------------------|
| group_5549 | 16 threonylcarbamoyl-AMP synthase                                     | TsaC  | Boryong_00<br>680 | Gilliam_022<br>54 | Ikeda_0108<br>0 | Karp_01998<br>Kato_00910 | TA686_0234<br>5 | UT176_009<br>44 | UT76-<br>HP_01862 |
| group_5448 | 16 glycine-tRNA ligase subunit beta                                   | GlyS  | Boryong_00<br>679 | Gilliam_022<br>55 | Ikeda_0108<br>1 | Karp_01999<br>Kato_00909 | TA686_0234<br>4 | UT176_009<br>43 | UT76-<br>HP_01863 |
| group_5840 | 16 glycine-tRNA ligase subunit alpha                                  | GlyQ  | Boryong_00<br>678 | Gilliam_022<br>56 | Ikeda_0108<br>2 | Karp_02000<br>Kato_00908 | TA686_0234<br>3 | UT176_009<br>42 | UT76-<br>HP_01864 |
| group_5574 | 17 competence protein ComEC                                           | ComEC | Boryong_01<br>456 | Gilliam_021<br>83 | Ikeda_0034<br>4 | Karp_01804<br>Kato_01216 | TA686_0095<br>0 | UT176_018<br>48 | UT76-<br>HP_01293 |
| group_5585 | 18 hypothetical protein                                               |       | Boryong_01<br>875 | Gilliam_014<br>46 | Ikeda_0106<br>2 | Karp_02242<br>Kato_00929 | TA686_0208<br>3 | UT176_011<br>40 | UT76-<br>HP_01619 |
| group_5622 | 19 hypothetical protein                                               |       | Boryong_00<br>133 | Gilliam_017<br>46 | Ikeda_0183<br>2 | Karp_00722<br>Kato_02398 | TA686_0180<br>2 | UT176_020<br>92 | UT76-<br>HP_02218 |
| group_5776 | 2,3,4,5-tetrahydropyridine-2,6-dicarboxylate N-19 succinyltransferase | DapD  | Boryong_00<br>132 | Gilliam_017<br>45 | Ikeda_0183<br>1 | Karp_00723<br>Kato_02399 | TA686_0180<br>3 | UT176_020<br>93 | UT76-<br>HP_02217 |
| group_5656 | 20 MFS transporter permease                                           |       | Boryong_00<br>574 | Gilliam_009<br>85 | Ikeda_0161<br>5 | Karp_00351<br>Kato_00491 | TA686_0038<br>3 | UT176_001<br>85 | UT76-<br>HP_00366 |
| group_5544 | 20 sodium:pantothenate symporter                                      |       | Boryong_00<br>573 | Gilliam_009<br>86 | Ikeda_0161<br>6 | Karp_00352<br>Kato_00492 | TA686_0038<br>2 | UT176_001<br>86 | UT76-<br>HP_00367 |
| group_5684 | 21 SAM-dependent methyltransferase                                    |       | Boryong_00<br>940 | Gilliam_025<br>22 | Ikeda_0191<br>4 | Karp_00101<br>Kato_02345 | TA686_0010<br>7 | UT176_005<br>53 | UT76-<br>HP_01014 |
| group_5705 | 22 two-component sensor histidine kinase                              |       | Boryong_01<br>454 | Gilliam_021<br>81 | Ikeda_0034<br>2 | Karp_01806<br>Kato_01218 | TA686_0095<br>2 | UT176_018<br>46 | UT76-<br>HP_01295 |
| group_6160 | 22 sigma-54-dependent Fis family transcriptional regulator            |       | Boryong_01<br>453 | Gilliam_021<br>80 | Ikeda_0034<br>1 | Karp_01807<br>Kato_01219 | TA686_0095<br>3 | UT176_018<br>45 | UT76-<br>HP_01296 |
| group_5483 | 22 hypothetical protein                                               |       | Boryong_01<br>452 | Gilliam_021<br>79 | Ikeda_0034<br>0 | Karp_01808<br>Kato_01220 | TA686_0095<br>4 | UT176_018<br>44 | UT76-<br>HP_01297 |
| group_5722 | 23 aspartate aminotransferase                                         | AspC  | Boryong_02<br>006 | Gilliam_000<br>94 | Ikeda_0134<br>0 | Karp_00229<br>Kato_00160 | TA686_0211<br>6 | UT176_001<br>01 | UT76-<br>HP_00570 |
| ubiG       | 23 Ubiquinone biosynthesis O-methyltransferase                        | UbiG  | Boryong_02<br>007 | Gilliam_000<br>95 | Ikeda_0134<br>1 | Karp_00230<br>Kato_00161 | TA686_0211<br>5 | UT176_001<br>02 | UT76-<br>HP_00569 |
| group_5723 | 23 ABC transporter                                                    |       | Boryong_02<br>008 | Gilliam_000<br>96 | Ikeda_0134<br>2 | Karp_00231<br>Kato_00162 | TA686_0211<br>4 | UT176_001<br>03 | UT76-<br>HP_00568 |
| group_5724 | 23 hypothetical protein                                               |       | Boryong_02<br>009 | Gilliam_000<br>97 | Ikeda_0134<br>3 | Karp_00232<br>Kato_00163 | TA686_0211<br>3 | UT176_001<br>04 | UT76-<br>HP_00567 |
| group_5900 | 23 coproporphyrinogen III oxidase                                     |       | Boryong_02<br>010 | Gilliam_000<br>98 | Ikeda_0134<br>4 | Karp_00233<br>Kato_00164 | TA686_0211<br>2 | UT176_001<br>05 | UT76-<br>HP_00566 |
| group_6112 | 23 hypothetical protein                                               |       | Boryong_02<br>011 | Gilliam_000<br>99 | Ikeda_0134<br>5 | Karp_00234<br>Kato_00165 | TA686_0211<br>1 | UT176_001<br>06 | UT76-<br>HP_00565 |
| group_5587 | 23 DNA repair protein RecO                                            | RecO  | Boryong_02<br>012 | Gilliam_001<br>00 | Ikeda_0134<br>6 | Karp_00235<br>Kato_00166 | TA686_0211<br>0 | UT176_001<br>07 | UT76-<br>HP_00564 |
| group_5732 | 24 DNA helicase II                                                    | UvrD  | Boryong_02<br>217 | Gilliam_006<br>18 | Ikeda_0057<br>3 | Karp_01153<br>Kato_01479 | TA686_0199<br>7 | UT176_014<br>93 | UT76-<br>HP_01067 |
| group_5740 | 25 NAD-glutamate dehydrogenase                                        | GdhA  | Boryong_02<br>452 | Gilliam_010<br>83 | Ikeda_0211<br>6 | Karp_02529<br>Kato_00707 | TA686_0176<br>5 | UT176_006<br>39 | UT76-<br>HP_00743 |
| group_5739 | tRNA uridine-5-carboxymethylaminomethyl(34) synthesis GTPase          |       | Boryong_02<br>451 | Gilliam_010<br>84 | Ikeda_0211<br>5 | Karp_02530<br>Kato_00706 | TA686_0176<br>6 | UT176_006<br>40 | UT76-<br>HP_00744 |
| group_6137 | 25 recombinase XerC                                                   | XerC  | Boryong_02<br>450 | Gilliam_010<br>85 | Ikeda_0211<br>4 | Karp_02531<br>Kato_00705 | TA686_0176<br>7 | UT176_006<br>41 | UT76-<br>HP_00745 |
| group_6136 | 25 RNA polymerase-binding protein DksA                                | DksA  | Boryong_02<br>449 | Gilliam_010<br>86 | Ikeda_0211<br>3 | Karp_02532<br>Kato_00704 | TA686_0176<br>8 | UT176_006<br>42 | UT76-<br>HP_00746 |
| group_6135 | 25 inorganic pyrophosphatase                                          |       | Boryong_02<br>448 | Gilliam_010<br>87 | Ikeda_0211<br>2 | Karp_02533<br>Kato_00703 | TA686_0176<br>9 | UT176_006<br>43 | UT76-<br>HP_00747 |
| group_5415 | 25 DNA polymerase III subunit delta'                                  | HolB  | Boryong_02<br>447 | Gilliam_010<br>88 | Ikeda_0211<br>1 | Karp_02534<br>Kato_00702 | TA686_0177<br>0 | UT176_006<br>44 | UT76-<br>HP_00748 |
| group_5922 | 25 ribosomal large subunit pseudouridine synthase                     |       | Boryong_02<br>446 | Gilliam_010<br>89 | Ikeda_0211<br>0 | Karp_02535<br>Kato_00701 | TA686_0177<br>1 | UT176_006<br>45 | UT76-<br>HP_00749 |
| group_5791 | 26 tetraacyldisaccharide 4'-kinase                                    | IpxK  | Boryong_00<br>218 | Gilliam_012<br>19 | Ikeda_0202<br>0 | Karp_00613<br>Kato_00657 | TA686_0025<br>3 | UT176_004<br>27 | UT76-<br>HP_02120 |
| group_7640 | 26 hypothetical protein                                               |       | Boryong_00<br>219 | Gilliam_012<br>20 | Ikeda_0202<br>1 | Karp_00614<br>Kato_00658 | TA686_0025<br>4 | UT176_004<br>28 | UT76-<br>HP_02119 |
| group_5849 | 27 transporter                                                        |       | Boryong_00<br>935 | Gilliam_025<br>19 | Ikeda_0191<br>0 | Karp_00104<br>Kato_02349 | TA686_0164<br>3 | UT176_005<br>49 | UT76-<br>HP_01018 |
| glpE       | 27 hypothetical protein                                               |       | Boryong_00<br>934 | Gilliam_025<br>18 | Ikeda_0190<br>9 | Karp_00105<br>Kato_02350 | TA686_0164<br>2 | UT176_005<br>48 | UT76-<br>HP_01019 |
| group_5864 | 28 protein translocase subunit SecF                                   | SecF  | Boryong_01<br>198 | Gilliam_017<br>29 | Ikeda_0048<br>6 | Karp_01854<br>Kato_01657 | TA686_0054<br>1 | UT176_013<br>61 | UT76-<br>HP_01644 |
| group_6056 | 28 DNA mismatch repair protein MutS                                   | MutS  | Boryong_01<br>199 | Gilliam_017<br>30 | Ikeda_0048<br>5 | Karp_01855<br>Kato_01658 | TA686_0054<br>2 | UT176_013<br>60 | UT76-<br>HP_01643 |



|            |                                                                 |      |                   |                   |                 |                 |                 |                  |                 |                   |
|------------|-----------------------------------------------------------------|------|-------------------|-------------------|-----------------|-----------------|-----------------|------------------|-----------------|-------------------|
| group_6057 | 28 ATP/ADP translocase                                          |      | Boryong_01<br>200 | Gilliam_017<br>31 | Ikeda_0048<br>4 | Karp_01856<br>3 | Kato_01659<br>3 | TA686_0054<br>59 | UT176_013<br>59 | UT76-<br>HP_01642 |
| group_5882 | 29 haloacid dehalogenase                                        |      | Boryong_01<br>633 | Gilliam_016<br>59 | Ikeda_0094<br>4 | Karp_01021<br>2 | Kato_01991<br>2 | TA686_0073<br>08 | UT176_014<br>08 | UT76-<br>HP_00989 |
| group_7708 | 29 DNA gyrase subunit B                                         | GyrB | Boryong_01<br>632 | Gilliam_016<br>58 | Ikeda_0094<br>5 | Karp_01022<br>3 | Kato_01992<br>3 | TA686_0073<br>07 | UT176_014<br>07 | UT76-<br>HP_00988 |
| group_5577 | 29 hypothetical protein                                         |      | Boryong_01<br>631 | Gilliam_016<br>57 | Ikeda_0094<br>6 | Karp_01023<br>4 | Kato_01993<br>4 | TA686_0073<br>06 | UT176_014<br>06 | UT76-<br>HP_00987 |
| group_5881 | 29 amino acid permease                                          |      | Boryong_01<br>630 | Gilliam_016<br>56 | Ikeda_0094<br>7 | Karp_01024<br>5 | Kato_01994<br>5 | TA686_0073<br>05 | UT176_014<br>05 | UT76-<br>HP_00986 |
| group_5895 | 30 succinate dehydrogenase iron-sulfur subunit                  | SdhB | Boryong_01<br>938 | Gilliam_009<br>45 | Ikeda_0220<br>8 | Karp_02372<br>5 | Kato_02140<br>5 | TA686_0023<br>89 | UT176_006<br>89 | UT76-<br>HP_00157 |
| group_6106 | 30 succinate dehydrogenase flavoprotein subunit                 | SdhA | Boryong_01<br>937 | Gilliam_009<br>44 | Ikeda_0220<br>9 | Karp_02373<br>6 | Kato_02139<br>6 | TA686_0023<br>88 | UT176_006<br>88 | UT76-<br>HP_00156 |
| group_5586 | 30 succinate dehydrogenase, hydrophobic membrane anchor protein | SdhD | Boryong_01<br>936 | Gilliam_009<br>43 | Ikeda_0221<br>0 | Karp_02374<br>7 | Kato_02138<br>7 | TA686_0023<br>87 | UT176_006<br>87 | UT76-<br>HP_00155 |
| group_5721 | 30 succinate dehydrogenase, cytochrome b556 subunit             | SdhC | Boryong_01<br>935 | Gilliam_009<br>42 | Ikeda_0221<br>1 | Karp_02375<br>8 | Kato_02137<br>8 | TA686_0023<br>86 | UT176_006<br>86 | UT76-<br>HP_00154 |
| group_5901 | 31 hypothetical protein                                         |      | Boryong_02<br>018 | Gilliam_001<br>08 | Ikeda_0135<br>3 | Karp_00239<br>4 | Kato_00172<br>4 | TA686_0120<br>13 | UT176_001<br>13 | UT76-<br>HP_00558 |
| group_6113 | 31 hypothetical protein                                         |      | Boryong_02<br>019 | Gilliam_001<br>09 | Ikeda_0135<br>4 | Karp_00240<br>5 | Kato_00173<br>5 | TA686_0120<br>14 | UT176_001<br>14 | UT76-<br>HP_00557 |
| group_8000 | 31 30S ribosomal protein S12                                    | RpsL | Boryong_02<br>020 | Gilliam_001<br>10 | Ikeda_0135<br>5 | Karp_00241<br>6 | Kato_00174<br>6 | TA686_0120<br>15 | UT176_001<br>15 | UT76-<br>HP_00556 |
| group_7893 | 31 30S ribosomal protein S7                                     | RpsG | Boryong_02<br>021 | Gilliam_001<br>11 | Ikeda_0135<br>6 | Karp_00242<br>7 | Kato_00175<br>7 | TA686_0120<br>16 | UT176_001<br>16 | UT76-<br>HP_00555 |
| group_7759 | 31 elongation factor G                                          | EFG  | Boryong_02<br>022 | Gilliam_001<br>12 | Ikeda_0135<br>7 | Karp_00243<br>8 | Kato_00176<br>8 | TA686_0120<br>17 | UT176_001<br>17 | UT76-<br>HP_00554 |
| group_5902 | 31 30S ribosomal protein S1                                     | RpsA | Boryong_02<br>023 | Gilliam_001<br>13 | Ikeda_0135<br>8 | Karp_00244<br>9 | Kato_00177<br>9 | TA686_0120<br>18 | UT176_001<br>18 | UT76-<br>HP_00553 |
| group_6017 | 32 50S ribosomal protein L20                                    | RplT | Boryong_00<br>628 | Gilliam_023<br>47 | Ikeda_0090<br>2 | Karp_00926<br>3 | Kato_01948<br>3 | TA686_0083<br>65 | UT176_011<br>65 | UT76-<br>HP_00870 |
| group_7830 | 32 50S ribosomal protein L35                                    | RpmL | Boryong_00<br>627 | Gilliam_023<br>48 | Ikeda_0090<br>3 | Karp_00927<br>4 | Kato_01949<br>4 | TA686_0083<br>66 | UT176_011<br>66 | UT76-<br>HP_00871 |
| group_8150 | 32 molecular chaperone HtpG                                     | HtpG | Boryong_00<br>626 | Gilliam_023<br>49 | Ikeda_0090<br>4 | Karp_00928<br>5 | Kato_01950<br>5 | TA686_0083<br>67 | UT176_011<br>67 | UT76-<br>HP_00872 |
| group_5657 | 32 succinyl-diaminopimelate desuccinylase                       | DapE | Boryong_00<br>625 | Gilliam_023<br>50 | Ikeda_0090<br>5 | Karp_00929<br>6 | Kato_01951<br>6 | TA686_0083<br>68 | UT176_011<br>68 | UT76-<br>HP_00873 |
| group_6033 | 33 DNA translocase FtsK                                         | FtsK | Boryong_00<br>894 | Gilliam_012<br>56 | Ikeda_0043<br>0 | Karp_01269<br>3 | Kato_01542<br>3 | TA686_0058<br>46 | UT176_016<br>46 | UT76-<br>HP_01670 |
| group_5682 | 33 hypothetical protein                                         |      | Boryong_00<br>895 | Gilliam_012<br>57 | Ikeda_0042<br>9 | Karp_01270<br>4 | Kato_01541<br>4 | TA686_0058<br>47 | UT176_016<br>47 | UT76-<br>HP_01669 |
| group_7304 | 33 energy-dependent translational throttle protein EttA         | EttA | Boryong_00<br>896 | Gilliam_012<br>58 | Ikeda_0042<br>8 | Karp_01271<br>5 | Kato_01540<br>5 | TA686_0058<br>48 | UT176_016<br>48 | UT76-<br>HP_01668 |
| group_5348 | 33 hypothetical protein                                         |      | Boryong_00<br>897 | Gilliam_012<br>59 | Ikeda_0042<br>7 | Karp_01272<br>6 | Kato_01539<br>6 | TA686_0058<br>49 | UT176_016<br>49 | UT76-<br>HP_01667 |
| group_6064 | 34 alpha/beta hydrolase                                         |      | Boryong_01<br>286 | Gilliam_016<br>21 | Ikeda_0065<br>5 | Karp_01105<br>1 | Kato_01727<br>1 | TA686_0081<br>36 | UT176_015<br>36 | UT76-<br>HP_00785 |
| group_5701 | 34 iron-sulfur-binding protein                                  |      | Boryong_01<br>285 | Gilliam_016<br>20 | Ikeda_0065<br>4 | Karp_01106<br>2 | Kato_01726<br>2 | TA686_0081<br>35 | UT176_015<br>35 | UT76-<br>HP_00784 |
| group_5400 | 34 aminotransferase class V-fold PLP-dependent enzyme           |      | Boryong_01<br>284 | Gilliam_016<br>19 | Ikeda_0065<br>3 | Karp_01107<br>3 | Kato_01725<br>3 | TA686_0081<br>34 | UT176_015<br>34 | UT76-<br>HP_00783 |
| group_6063 | 34 cysteine desulfurase                                         |      | Boryong_01<br>283 | Gilliam_016<br>18 | Ikeda_0065<br>2 | Karp_01108<br>4 | Kato_01724<br>4 | TA686_0081<br>33 | UT176_015<br>33 | UT76-<br>HP_00782 |
| group_5868 | 34 iron-sulfur cluster scaffold-like protein                    |      | Boryong_01<br>282 | Gilliam_016<br>17 | Ikeda_0065<br>1 | Karp_01109<br>5 | Kato_01723<br>5 | TA686_0081<br>32 | UT176_015<br>32 | UT76-<br>HP_00781 |
| group_6062 | 34 iron-sulfur cluster assembly accessory protein               |      | Boryong_01<br>281 | Gilliam_016<br>16 | Ikeda_0065<br>0 | Karp_01110<br>6 | Kato_01722<br>6 | TA686_0081<br>31 | UT176_015<br>31 | UT76-<br>HP_00780 |
| group_5564 | 34 co-chaperone HscB                                            | HscB | Boryong_01<br>280 | Gilliam_016<br>15 | Ikeda_0064<br>9 | Karp_01111<br>7 | Kato_01721<br>7 | TA686_0081<br>30 | UT176_015<br>30 | UT76-<br>HP_00779 |
| group_5867 | 34 molecular chaperone HscA                                     | HscA | Boryong_01<br>279 | Gilliam_016<br>14 | Ikeda_0064<br>8 | Karp_01112<br>8 | Kato_01720<br>8 | TA686_0081<br>29 | UT176_015<br>29 | UT76-<br>HP_00778 |
| group_5563 | 34 (2Fe-2S) ferredoxin                                          |      | Boryong_01<br>278 | Gilliam_016<br>13 | Ikeda_0064<br>7 | Karp_01113<br>9 | Kato_01719<br>9 | TA686_0081<br>28 | UT176_015<br>28 | UT76-<br>HP_00777 |
| group_6072 | 35 electron transporter                                         |      | Boryong_01<br>395 | Gilliam_001<br>96 | Ikeda_0107<br>6 | Karp_01763<br>1 | Kato_00913<br>1 | TA686_0225<br>54 | UT176_011<br>54 | UT76-<br>HP_01631 |

|            |                                                                             |      |                   |                   |                 |                       |                              |                   |
|------------|-----------------------------------------------------------------------------|------|-------------------|-------------------|-----------------|-----------------------|------------------------------|-------------------|
| group_6074 | 36 single-stranded DNA-binding protein                                      |      | Boryong_01<br>420 | Gilliam_019<br>83 | Ikeda_0083<br>0 | Karp_01239 Kato_01364 | TA686_0178 UT176_018<br>6 02 | UT76-<br>HP_01743 |
| group_5704 | 36 hypothetical protein                                                     |      | Boryong_01<br>419 | Gilliam_019<br>82 | Ikeda_0083<br>1 | Karp_01240 Kato_01363 | TA686_0178 UT176_018<br>5 03 | UT76-<br>HP_01742 |
| group_6078 | 37 malate dehydrogenase                                                     | Mdh  | Boryong_01<br>520 | Gilliam_015<br>26 | Ikeda_0066<br>3 | Karp_01409 Kato_01734 | TA686_0254 UT176_014<br>1 50 | UT76-<br>HP_01425 |
| group_6077 | 37 permease                                                                 |      | Boryong_01<br>519 | Gilliam_015<br>27 | Ikeda_0066<br>4 | Karp_01410 Kato_01735 | TA686_0254 UT176_014<br>0 51 | UT76-<br>HP_01426 |
| group_5484 | 37 hypothetical protein                                                     |      | Boryong_01<br>518 | Gilliam_015<br>28 | Ikeda_0066<br>5 | Karp_01411 Kato_01736 | TA686_0253 UT176_014<br>9 52 | UT76-<br>HP_01427 |
| group_6083 | 38 cytochrome b                                                             | CybB | Boryong_01<br>614 | Gilliam_026<br>91 | Ikeda_0081<br>9 | Karp_01467 Kato_01374 | TA686_0079 UT176_016<br>3 60 | UT76-<br>HP_01121 |
| group_5878 | 38 ubiquinol-cytochrome c reductase iron-sulfur subunit                     | PetA | Boryong_01<br>613 | Gilliam_026<br>90 | Ikeda_0082<br>0 | Karp_01468 Kato_01373 | TA686_0079 UT176_016<br>2 61 | UT76-<br>HP_01120 |
| group_5486 | 38 hypothetical protein                                                     |      | Boryong_01<br>612 | Gilliam_026<br>89 | Ikeda_0082<br>1 | Karp_01469 Kato_01372 | TA686_0079 UT176_016<br>1 62 | UT76-<br>HP_01119 |
| group_5877 | 38 heme exporter protein B                                                  | CcmB | Boryong_01<br>611 | Gilliam_026<br>88 | Ikeda_0082<br>2 | Karp_01470 Kato_01371 | TA686_0079 UT176_016<br>0 63 | UT76-<br>HP_01118 |
| group_5709 | 38 cytochrome c biogenesis protein CcmA                                     | CcmA | Boryong_01<br>610 | Gilliam_026<br>87 | Ikeda_0082<br>3 | Karp_01471 Kato_01370 | TA686_0078 UT176_016<br>9 64 | UT76-<br>HP_01117 |
| group_6087 | 39 2-hydroxyacid dehydrogenase                                              |      | Boryong_01<br>640 | Gilliam_016<br>66 | Ikeda_0093<br>7 | Karp_01014 Kato_01984 | TA686_0072 UT176_014<br>5 15 | UT76-<br>HP_00996 |
| group_7914 | 39 cation:proton antiporter                                                 |      | Boryong_01<br>639 | Gilliam_016<br>65 | Ikeda_0093<br>8 | Karp_01015 Kato_01985 | TA686_0072 UT176_014<br>6 14 | UT76-<br>HP_00995 |
| group_6086 | 39 cation:proton antiporter                                                 |      | Boryong_01<br>638 | Gilliam_016<br>64 | Ikeda_0093<br>9 | Karp_01016 Kato_01986 | TA686_0072 UT176_014<br>7 13 | UT76-<br>HP_00994 |
| group_5883 | 39 sodium:proton antiporter                                                 |      | Boryong_01<br>637 | Gilliam_016<br>63 | Ikeda_0094<br>0 | Karp_01017 Kato_01987 | TA686_0072 UT176_014<br>8 12 | UT76-<br>HP_00993 |
| group_5710 | 39 sodium:proton antiporter                                                 |      | Boryong_01<br>636 | Gilliam_016<br>62 | Ikeda_0094<br>1 | Karp_01018 Kato_01988 | TA686_0072 UT176_014<br>9 11 | UT76-<br>HP_00992 |
| group_8081 | 39 sodium:proton antiporter                                                 |      | Boryong_01<br>635 | Gilliam_016<br>61 | Ikeda_0094<br>2 | Karp_01019 Kato_01989 | TA686_0073 UT176_014<br>0 10 | UT76-<br>HP_00991 |
| group_6098 | 40 hypothetical protein                                                     |      | Boryong_01<br>851 | Gilliam_014<br>22 | Ikeda_0103<br>7 | Karp_02217 Kato_00953 | TA686_0149 UT176_013<br>6 71 | UT76-<br>HP_01595 |
| group_6107 | 41 S26 family signal peptidase                                              |      | Boryong_01<br>941 | Gilliam_009<br>52 | Ikeda_0220<br>5 | Karp_00806 Kato_02077 | TA686_0027 UT176_008<br>2 90 | UT76-<br>HP_02017 |
| group_6108 | 41 ribonuclease III                                                         | Rnc  | Boryong_01<br>942 | Gilliam_009<br>53 | Ikeda_0220<br>4 | Karp_00807 Kato_02076 | TA686_0027 UT176_008<br>3 89 | UT76-<br>HP_02016 |
| group_6121 | 42 nucleoside-diphosphate kinase                                            | Ndk  | Boryong_02<br>109 | Gilliam_008<br>55 | Ikeda_0214<br>9 | Karp_02170 Kato_00743 | TA686_0108 UT176_019<br>1 40 | UT76-<br>HP_00186 |
| group_6122 | 43 hypothetical protein                                                     |      | Boryong_02<br>132 | Gilliam_015<br>67 | Ikeda_0079<br>1 | Karp_01397 Kato_01402 | TA686_0232 UT176_017<br>8 08 | UT76-<br>HP_01343 |
| group_6132 | 44 phospholipase D family protein                                           |      | Boryong_02<br>222 | Gilliam_006<br>12 | Ikeda_0056<br>7 | Karp_01146 Kato_01485 | TA686_0162 UT176_014<br>8 87 | UT76-<br>HP_01062 |
| group_6754 | 45 elongation factor 4                                                      | lepA | Boryong_01<br>410 | Gilliam_021<br>08 | Ikeda_0083<br>4 | Karp_01242 Kato_01360 | TA686_0136 UT176_013<br>8 01 | UT76-<br>HP_01739 |
| group_5874 | 45 peptide chain release factor 1                                           | PrfA | Boryong_01<br>409 | Gilliam_021<br>07 | Ikeda_0083<br>5 | Karp_01243 Kato_01359 | TA686_0136 UT176_013<br>7 02 | UT76-<br>HP_01738 |
| group_7286 | 46 DNA-binding protein                                                      |      | Boryong_00<br>490 | Gilliam_007<br>21 | Ikeda_0002<br>7 | Karp_02417 Kato_02102 | TA686_0075 UT176_006<br>7 21 | UT76-<br>HP_01986 |
| surA       | 46 Chaperone SurA                                                           | SurA | Boryong_00<br>489 | Gilliam_007<br>20 | Ikeda_0002<br>8 | Karp_02418 Kato_02101 | TA686_0075 UT176_006<br>8 20 | UT76-<br>HP_01985 |
| group_6007 | 16S rRNA (adenine(1518)-N(6)/adenine(1519)-N(6))-<br>46 dimethyltransferase |      | Boryong_00<br>488 | Gilliam_007<br>19 | Ikeda_0002<br>9 | Karp_02419 Kato_02100 | TA686_0075 UT176_006<br>9 19 | UT76-<br>HP_01984 |
| group_5824 | 46 DNA recombination protein RmuC                                           | RmuC | Boryong_00<br>487 | Gilliam_007<br>18 | Ikeda_0003<br>0 | Karp_02420 Kato_02099 | TA686_0076 UT176_006<br>0 18 | UT76-<br>HP_01983 |
| group_5650 | 46 zinc metalloprotease                                                     |      | Boryong_00<br>486 | Gilliam_007<br>17 | Ikeda_0003<br>1 | Karp_02421 Kato_02098 | TA686_0076 UT176_006<br>1 17 | UT76-<br>HP_01982 |
| group_5539 | 46 outer membrane protein assembly factor BamA                              | BamA | Boryong_00<br>485 | Gilliam_007<br>16 | Ikeda_0003<br>2 | Karp_02422 Kato_02097 | TA686_0076 UT176_006<br>2 16 | UT76-<br>HP_01981 |
| group_5649 | 46 thiol reductase thioredoxin                                              |      | Boryong_00<br>484 | Gilliam_007<br>15 | Ikeda_0003<br>3 | Karp_02423 Kato_02096 | TA686_0076 UT176_006<br>3 15 | UT76-<br>HP_01980 |
| group_7769 | 47 thioredoxin-disulfide reductase                                          | TrxB | Boryong_00<br>020 | Gilliam_000<br>24 | Ikeda_0175<br>7 | Karp_00011 Kato_00071 | TA686_0237 UT176_003<br>5 64 | UT76-<br>HP_00026 |
| group_7112 | 47 permease                                                                 |      | Boryong_00<br>021 | Gilliam_000<br>25 | Ikeda_0175<br>8 | Karp_00012 Kato_00070 | TA686_0237 UT176_003<br>6 63 | UT76-<br>HP_00025 |
| group_5621 | 47 translocation protein TolB                                               | TolB | Boryong_00<br>022 | Gilliam_000<br>26 | Ikeda_0175<br>9 | Karp_00013 Kato_00069 | TA686_0237 UT176_003<br>7 62 | UT76-<br>HP_00024 |

|            |                                                           |      |                   |                   |                 |                          |   |                         |    |                   |
|------------|-----------------------------------------------------------|------|-------------------|-------------------|-----------------|--------------------------|---|-------------------------|----|-------------------|
| group_5775 | 47 dihydrolipoyl dehydrogenase                            | lpdA | Boryong_00<br>023 | Gilliam_000<br>27 | Ikeda_0176<br>0 | Karp_00014<br>Kato_00068 | 8 | TA686_0237<br>UT176_003 | 61 | UT76-<br>HP_00023 |
| group_5425 | 47 SAM-dependent methyltransferase                        |      | Boryong_00<br>024 | Gilliam_000<br>28 | Ikeda_0176<br>1 | Karp_00015<br>Kato_00067 | 9 | TA686_0237<br>UT176_003 | 60 | UT76-<br>HP_00022 |
| group_5426 | 47 hypothetical protein                                   |      | Boryong_00<br>025 | Gilliam_000<br>29 | Ikeda_0176<br>2 | Karp_00016<br>Kato_00066 | 0 | TA686_0238<br>UT176_003 | 59 | UT76-<br>HP_00021 |
| group_7894 | 48 type I methionyl aminopeptidase                        | Map  | Boryong_01<br>573 | Gilliam_019<br>47 | Ikeda_0042<br>0 | Karp_01288<br>Kato_01532 | 5 | TA686_0076<br>UT176_017 | 51 | UT76-<br>HP_01652 |
| group_7905 | 49 ubiquinone biosynthesis protein UbiB                   | UbiB | Boryong_01<br>795 | Gilliam_021<br>98 | Ikeda_0070<br>5 | Karp_01872<br>Kato_01873 | 4 | TA686_0028<br>UT176_017 | 00 | UT76-<br>HP_01485 |
| group_5580 | 49 ubiquinone biosynthesis protein                        | UbiJ | Boryong_01<br>796 | Gilliam_021<br>97 | Ikeda_0070<br>4 | Karp_01873<br>Kato_01872 | 3 | TA686_0028<br>UT176_017 | 01 | UT76-<br>HP_01486 |
| group_6093 | 49 ribosome maturation factor                             |      | Boryong_01<br>797 | Gilliam_021<br>96 | Ikeda_0070<br>3 | Karp_01874<br>Kato_01871 | 2 | TA686_0028<br>UT176_017 | 02 | UT76-<br>HP_01487 |
| group_6094 | 49 transcription termination/antitermination protein NusA | NusA | Boryong_01<br>798 | Gilliam_021<br>95 | Ikeda_0070<br>2 | Karp_01875<br>Kato_01870 | 1 | TA686_0028<br>UT176_017 | 03 | UT76-<br>HP_01488 |
| group_5889 | 49 translation initiation factor IF-2                     | InfB | Boryong_01<br>799 | Gilliam_021<br>94 | Ikeda_0070<br>1 | Karp_01876<br>Kato_01869 | 0 | TA686_0028<br>UT176_017 | 04 | UT76-<br>HP_01489 |
| group_7895 | 49 ribosome-binding factor A                              | RbfA | Boryong_01<br>800 | Gilliam_021<br>93 | Ikeda_0070<br>0 | Karp_01877<br>Kato_01868 | 9 | TA686_0027<br>UT176_017 | 05 | UT76-<br>HP_01490 |
| group_7960 | 50 preprotein translocase subunit YajC                    | YajC | Boryong_02<br>000 | Gilliam_000<br>87 | Ikeda_0133<br>0 | Karp_00223<br>Kato_00152 | 3 | TA686_0231<br>UT176_008 | 45 | UT76-<br>HP_00576 |
| group_6110 | 50 protein translocase subunit SecD                       | SecD | Boryong_02<br>001 | Gilliam_000<br>88 | Ikeda_0133<br>1 | Karp_00224<br>Kato_00153 | 2 | TA686_0231<br>UT176_008 | 46 | UT76-<br>HP_00575 |
| group_8117 | 51 peptidase S66                                          |      | Boryong_00<br>304 | Gilliam_005<br>80 | Ikeda_0159<br>2 | Karp_00511<br>Kato_00468 | 1 | TA686_0176<br>UT176_002 | 61 | UT76-<br>HP_00436 |

| Product                              | Boryong | Gilliam | Ikeda | Karp | Kato | TA686 | UT176 | UT76 |
|--------------------------------------|---------|---------|-------|------|------|-------|-------|------|
| (p)pGpp hydrolase                    | 37      | 31      | 25    | 40   | 26   | 14    | 16    | 25   |
| (p)ppGpp synthetase                  | 2       | 2       | 1     | 5    | 1    | 0     | 2     | 2    |
| spoT ppGpp hydrolase                 | 3       | 15      | 7     | 16   | 9    | 11    | 5     | 5    |
| ABC transporter ATP-binding protein  | 1       | 2       | 2     | 2    | 3    | 2     | 1     | 3    |
| Aconitate hydratase A                | 1       | 1       | 2     | 1    | 2    | 0     | 1     | 1    |
| All ankyrin proteins                 | 43      | 46      | 40    | 58   | 37   | 39    | 37    | 38   |
| ankyrin                              | 14      | 26      | 18    | 33   | 23   | 21    | 21    | 25   |
| ankyrin repeat-containing protein    | 13      | 10      | 13    | 11   | 7    | 4     | 10    | 8    |
| ankyrin repeat-containing protein 09 | 4       | 6       | 3     | 4    | 2    | 8     | 3     | 3    |
| ankyrin repeat-containing protein 13 | 3       | 1       | 1     | 1    | 1    | 0     | 1     | 1    |
| ankyrin repeat-containing protein 16 | 9       | 0       | 2     | 7    | 2    | 2     | 1     | 0    |
| ankyrin repeat-containing protein 17 | 0       | 1       | 1     | 1    | 0    | 4     | 1     | 0    |
| ankyrin repeat-containing protein 19 | 0       | 2       | 2     | 1    | 2    | 0     | 0     | 1    |
| ATP-binding protein                  | 48      | 85      | 63    | 99   | 91   | 97    | 44    | 87   |
| Cell division protein FtsB           | 1       | 2       | 1     | 1    | 1    | 1     | 1     | 1    |
| All conjugal transfer proteins       | 461     | 532     | 378   | 570  | 502  | 462   | 330   | 481  |
| conjugal transfer protein            | 166     | 202     | 138   | 242  | 181  | 202   | 137   | 194  |
| conjugal transfer protein TraA       | 75      | 86      | 60    | 83   | 56   | 64    | 41    | 62   |
| conjugal transfer protein TraC       | 70      | 50      | 39    | 40   | 65   | 37    | 34    | 61   |
| conjugal transfer protein TraD       | 1       | 0       | 2     | 2    | 2    | 2     | 0     | 0    |
| conjugal transfer protein TraG       | 13      | 29      | 21    | 28   | 24   | 25    | 19    | 24   |

|                                                                |     |     |     |     |     |     |     |     |
|----------------------------------------------------------------|-----|-----|-----|-----|-----|-----|-----|-----|
| conjugal transfer protein TraH                                 | 41  | 37  | 37  | 44  | 52  | 34  | 24  | 41  |
| conjugal transfer protein Tral                                 | 41  | 62  | 32  | 65  | 48  | 50  | 25  | 33  |
| conjugal transfer protein TraN                                 | 46  | 49  | 30  | 38  | 40  | 27  | 36  | 45  |
| type-F conjugative transfer system pilin assembly protein TrbC | 0   | 0   | 0   | 2   | 0   | 0   | 0   | 0   |
| type-F conjugative transfer system protein TraW                | 8   | 17  | 19  | 26  | 34  | 21  | 14  | 21  |
| deoxyribodipyrimidine photo-lyase                              | 4   | 1   | 1   | 1   | 1   | 0   | 1   | 0   |
| DNA helicase                                                   | 0   | 0   | 1   | 3   | 6   | 0   | 0   | 1   |
| DNA methyltransferase                                          | 27  | 32  | 17  | 29  | 26  | 22  | 17  | 28  |
| DNA polymerase III subunit epsilon                             | 1   | 1   | 1   | 1   | 1   | 2   | 1   | 1   |
| elongation factor Tu                                           | 2   | 2   | 2   | 2   | 2   | 2   | 2   | 2   |
| exodeoxyribonuclease III                                       | 3   | 1   | 4   | 4   | 2   | 1   | 2   | 3   |
| exodeoxyribonuclease VII small subunit                         | 1   | 1   | 1   | 1   | 1   | 2   | 1   | 1   |
| Group II intron-encoded protein LtrA                           | 0   | 0   | 0   | 0   | 0   | 4   | 0   | 0   |
| guanosine polyphosphate pyrophosphohydrolase                   | 3   | 2   | 10  | 3   | 9   | 11  | 1   | 5   |
| helix-turn-helix domain-containing protein                     | 3   | 0   | 0   | 0   | 0   | 4   | 0   | 0   |
| histidine kinase                                               | 1   | 8   | 9   | 8   | 13  | 16  | 1   | 9   |
| HNH endonuclease                                               | 4   | 2   | 1   | 32  | 19  | 37  | 0   | 3   |
| hydrolase                                                      | 5   | 13  | 13  | 11  | 20  | 12  | 7   | 14  |
| hypothetical protein                                           | 321 | 250 | 180 | 259 | 241 | 242 | 134 | 188 |
| integrase                                                      | 69  | 77  | 69  | 71  | 92  | 87  | 44  | 82  |

|                                                         |     |     |     |     |     |     |     |     |
|---------------------------------------------------------|-----|-----|-----|-----|-----|-----|-----|-----|
| All transposases                                        | 338 | 602 | 306 | 325 | 242 | 409 | 487 | 242 |
| DDE transposase family protein                          | 0   | 0   | 4   | 2   | 1   | 3   | 0   | 1   |
| IS110 family transposase                                | 19  | 8   | 34  | 22  | 14  | 23  | 13  | 5   |
| IS5 family transposase ISOt6                            | 199 | 157 | 101 | 143 | 85  | 163 | 73  | 87  |
| IS630 family transposase                                | 26  | 342 | 71  | 27  | 37  | 83  | 316 | 29  |
| transposase                                             | 94  | 95  | 96  | 131 | 105 | 137 | 85  | 120 |
| lipase LipB                                             | 1   | 1   | 1   | 1   | 1   | 1   | 0   | 2   |
| lysine--tRNA ligase                                     | 1   | 1   | 1   | 1   | 1   | 2   | 1   | 1   |
| membrane protein                                        | 12  | 27  | 17  | 34  | 25  | 20  | 16  | 22  |
| N-6 DNA methylase                                       | 6   | 1   | 0   | 0   | 0   | 0   | 0   | 0   |
| NADP-dependent oxidoreductase                           | 1   | 1   | 2   | 1   | 1   | 1   | 1   | 1   |
| peroxiredoxin                                           | 1   | 2   | 4   | 4   | 7   | 5   | 2   | 2   |
| phosphatidate cytidyltransferase                        | 1   | 2   | 1   | 1   | 1   | 1   | 1   | 1   |
| phosphoribosylaminoimidazolesuccinocarboxamide synthase | 1   | 1   | 1   | 1   | 1   | 3   | 2   | 2   |
| polyribonucleotide nucleotidyltransferase               | 1   | 1   | 1   | 1   | 1   | 1   | 1   | 2   |
| preprotein translocase SecA subunit-like protein        | 0   | 4   | 2   | 7   | 2   | 9   | 0   | 2   |
| Propionyl-CoA carboxylase beta chain                    | 0   | 1   | 2   | 1   | 2   | 0   | 1   | 1   |
| repeat-containing protein D                             | 4   | 0   | 4   | 1   | 2   | 0   | 1   | 1   |
| replicative DNA helicase                                | 47  | 33  | 28  | 40  | 36  | 39  | 17  | 34  |
| reverse transcriptase                                   | 58  | 19  | 32  | 5   | 33  | 23  | 2   | 6   |
| RNA-binding protein                                     | 3   | 2   | 5   | 10  | 3   | 12  | 4   | 4   |

|                                    |                                  |    |    |    |    |    |    |    |    |
|------------------------------------|----------------------------------|----|----|----|----|----|----|----|----|
| sodium:proline symporter           |                                  | 4  | 4  | 7  | 6  | 8  | 5  | 5  | 5  |
| TAL effector protein PthXo1        |                                  | 1  | 0  | 3  | 2  | 3  | 0  | 1  | 3  |
| All TPR repeat-containing proteins |                                  | 22 | 40 | 18 | 29 | 37 | 24 | 22 | 27 |
|                                    | TPR repeat-containing protein 03 | 0  | 12 | 6  | 8  | 10 | 7  | 11 | 4  |
|                                    | TPR repeat-containing protein 08 | 22 | 28 | 12 | 21 | 27 | 17 | 11 | 23 |
| tryptophan--tRNA ligase            |                                  | 2  | 1  | 1  | 1  | 1  | 1  | 1  | 1  |
| UDP pyrophosphate synthase         |                                  | 1  | 2  | 1  | 1  | 1  | 1  | 1  | 1  |

710 *Table S6. Repeat gene counts in each strain. Repeat genes were grouped by protein similarity and annotated with the product of the longest*  
711 *gene in the group where annotations differed.*

712

| <b>Sample</b> | <b>Pseudogenes</b> | <b>Truncated 5'</b> | <b>Truncated 3'</b> | <b>Frameshift</b> |
|---------------|--------------------|---------------------|---------------------|-------------------|
| Boryong       | 432                | 219                 | 302                 | 46                |
| Gilliam       | 484                | 262                 | 278                 | 51                |
| Ikeda         | 257                | 141                 | 186                 | 38                |
| Karp          | 321                | 105                 | 236                 | 47                |
| Kato          | 286                | 143                 | 178                 | 57                |
| TA686         | 453                | 200                 | 307                 | 50                |
| UT176         | 465                | 107                 | 392                 | 53                |
| UT76          | 319                | 149                 | 203                 | 52                |

713 *Table S7. Pseudogenes and causes of pseudogenisation for each strain. The causes are not*  
714 *mutually exclusive, and may sum to greater than the total number of pseudogenes.*



|             | 56kDa | 47kDa | MLST | Core genome |
|-------------|-------|-------|------|-------------|
| 56kDa       | -     | 10    | 10   | 8           |
| 47kDa       | 10    | -     | 8    | 6           |
| MLST        | 10    | 8     | -    | 10          |
| Core genome | 8     | 6     | 10   | -           |

715 *Table S8. Robinson-Foulds distances between phylogenetic trees.*
